# Supplementary material for: Theoretical study on the rearrangement of metallabenzenes to cyclopentadienyl complexes
Source: Royal Society of Chemistry journal article supplement (doi:10.1039/c1dt10535c), 2011-01-01
Supplement: c1dt10535c.pdf [file c1dt10535c.pdf]

## Theoretical Study on the Rearrangement of Metallabenzenes to Cyclopentadienyl Complexes

**Chuan Shi, Tongxun Guo, Ka Chun Poon, Zhenyang Lin\* and Guochen Jia\***

*Department of Chemistry, The Hong Kong University of Science and Technology, Clear Water Bay, Kowloon, Hong Kong. Emails; [chzlin@ust.hk](mailto:chzlin@ust.hk); [chjiag@ust.hk](mailto:chjiag@ust.hk); Fax: +85223581594; Tel: +85223587379; +85223587361*

Tables giving Cartesian coordinates and electronic energies

## Cartesian coordinates for all the species calculated in this study:

### 1

E = -725.79421549 a.u.

|    |           |           |           |
|----|-----------|-----------|-----------|
| Re | 0.256438  | 0.000016  | 0.000004  |
| C  | -1.324996 | -0.000102 | 1.444926  |
| C  | -1.324997 | 0.000193  | -1.444921 |
| C  | -2.699676 | -0.000064 | 1.260099  |
| H  | -1.042983 | -0.000051 | 2.504367  |
| C  | -2.699676 | 0.000125  | -1.260094 |
| H  | -1.042983 | 0.000100  | -2.504361 |
| C  | -3.328923 | 0.000025  | 0.000003  |
| H  | -3.358573 | -0.000094 | 2.128334  |
| H  | -3.358573 | 0.000139  | -2.128328 |
| H  | -4.419008 | 0.000019  | 0.000004  |
| C  | 1.583079  | 0.000346  | -1.464444 |
| O  | 2.342681  | 0.000688  | -2.362372 |
| C  | 0.227145  | 1.990968  | 0.000426  |
| O  | 0.191020  | 3.159980  | 0.000631  |
| C  | 0.226966  | -1.990936 | -0.000418 |
| O  | 0.190767  | -3.159946 | -0.000688 |
| C  | 1.583087  | -0.000390 | 1.464444  |
| O  | 2.342688  | -0.001010 | 2.362373  |

|    |           |           |           |
|----|-----------|-----------|-----------|
| Re | -0.420665 | -0.042207 | 0.010506  |
| C  | 0.526715  | -1.919592 | 1.042571  |
| C  | 0.328631  | -2.242388 | -0.332747 |
| C  | 1.187518  | -1.394545 | -1.127666 |
| C  | 1.968717  | -0.608191 | -0.217389 |
| C  | 1.525232  | -0.870932 | 1.122660  |
| H  | 0.055374  | -2.398885 | 1.886296  |
| H  | -0.330444 | -3.004778 | -0.718012 |
| H  | 1.322902  | -1.422481 | -2.196415 |
| H  | 1.932129  | -0.456830 | 2.030647  |
| C  | -1.494302 | 0.517107  | 1.484249  |
| O  | -2.127297 | 0.822913  | 2.435358  |
| C  | -1.957881 | -0.170112 | -1.111179 |
| O  | -2.890293 | -0.304431 | -1.825297 |
| C  | -0.140338 | 1.769695  | -0.526392 |
| O  | 0.113500  | 2.875613  | -0.859818 |
| O  | 2.964597  | 0.216758  | -0.651311 |
| C  | 3.551283  | 1.153299  | 0.308166  |
| H  | 4.010991  | 0.615180  | 1.143315  |
| H  | 4.311992  | 1.691579  | -0.253303 |
| H  | 2.789437  | 1.848886  | 0.674443  |

### 2

E = -612.56879021 a.u.

|    |           |           |           |
|----|-----------|-----------|-----------|
| Re | 0.074885  | 0.000007  | -0.000247 |
| C  | -1.973279 | -0.723473 | -0.976874 |
| C  | -1.968692 | -1.161310 | 0.397527  |
| C  | -1.968424 | 0.010781  | 1.224401  |
| C  | -1.969459 | 1.166828  | 0.377014  |
| C  | -1.973633 | 0.704973  | -0.990232 |
| H  | -1.998696 | -1.365219 | -1.844192 |
| H  | -2.008871 | -2.183250 | 0.740188  |
| H  | -1.981240 | 0.020510  | 2.303841  |
| H  | -2.008761 | 2.194837  | 0.701314  |
| C  | -2.001124 | 1.330934  | -1.868862 |
| H  | 1.155875  | -1.348647 | -0.806796 |
| O  | 1.767645  | -2.216572 | -1.325574 |
| C  | 1.171010  | -0.023797 | 1.560970  |
| O  | 1.792745  | -0.039139 | 2.565783  |
| C  | 1.154900  | 1.373249  | -0.765376 |
| O  | 1.766174  | 2.256964  | -1.257407 |

### 5

E = -840.294113 a.u.

|    |           |           |           |
|----|-----------|-----------|-----------|
| Re | 0.761575  | -0.076674 | -0.131754 |
| C  | -1.210397 | 0.618225  | 0.399106  |
| C  | -0.243292 | -1.921152 | -0.585087 |
| C  | -2.416987 | -0.034090 | 0.368766  |
| H  | -1.302077 | 1.650604  | 0.753268  |
| C  | -1.573676 | -2.268546 | -0.496114 |
| H  | 0.373767  | -2.749411 | -0.951956 |
| C  | -2.590215 | -1.383150 | -0.049164 |
| H  | -1.880983 | -3.272122 | -0.779434 |
| C  | 2.485633  | -0.869103 | -0.656540 |
| O  | 3.499892  | -1.374477 | -0.977895 |
| C  | 0.414640  | 0.522871  | -1.994749 |
| O  | 0.184049  | 0.866615  | -3.089994 |
| C  | 0.986652  | -0.706655 | 1.739883  |
| O  | 1.092666  | -1.086576 | 2.842297  |
| C  | 1.523154  | 1.681724  | 0.330568  |
| O  | 1.944773  | 2.743108  | 0.615625  |
| H  | -3.338657 | 0.459195  | 0.672238  |
| O  | -3.890951 | -1.778860 | 0.019408  |
| C  | -4.322202 | -3.126970 | -0.359351 |
| H  | -5.397658 | -3.122644 | -0.194401 |
| H  | -4.102105 | -3.321621 | -1.412287 |
| H  | -3.845433 | -3.878030 | 0.275960  |

### 3

E = -840.274676 a.u.

|    |           |           |           |
|----|-----------|-----------|-----------|
| Re | -0.729397 | 0.065620  | -0.198301 |
| C  | 1.200604  | -0.817746 | -0.027717 |
| C  | 0.294114  | 1.907343  | 0.199217  |
| C  | 2.438240  | -0.240713 | 0.233426  |
| H  | 1.300376  | -1.901042 | -0.156593 |
| C  | 1.639434  | 2.130774  | 0.429627  |
| H  | -0.299975 | 2.827347  | 0.232715  |
| C  | 2.638063  | 1.132203  | 0.445819  |
| H  | 1.989215  | 3.146269  | 0.616816  |
| H  | 3.650399  | 1.474795  | 0.642419  |
| C  | -2.440224 | 1.047630  | -0.322055 |
| O  | -3.436096 | 1.669804  | -0.386114 |
| C  | -0.432721 | 0.349719  | -2.147320 |
| O  | -0.247788 | 0.527804  | -3.288070 |
| C  | -1.014881 | -0.171068 | 1.758669  |
| O  | -1.171400 | -0.298755 | 2.910381  |
| C  | -1.494555 | -1.722200 | -0.550979 |
| O  | -1.914142 | -2.801028 | -0.757954 |
| O  | 3.512162  | -1.156679 | 0.271620  |
| C  | 4.857287  | -0.685376 | 0.535046  |
| H  | 5.480493  | -1.578644 | 0.509028  |
| H  | 5.198136  | 0.019148  | -0.234557 |
| H  | 4.935876  | -0.215037 | 1.523694  |

### 6

E = -840.300968 a.u.

|    |           |           |           |
|----|-----------|-----------|-----------|
| Re | 0.342666  | -0.022921 | 0.310128  |
| C  | -1.677079 | 0.252973  | -0.403012 |
| C  | -0.524357 | -1.342929 | 1.769773  |
| C  | -2.870873 | -0.309227 | 0.092469  |
| C  | -1.846937 | -1.678789 | 1.956930  |
| H  | 0.151086  | -1.833639 | 2.478949  |
| C  | -2.921166 | -1.186578 | 1.169231  |
| H  | -2.124269 | -2.369004 | 2.753837  |
| H  | -3.913878 | -1.544541 | 1.441674  |
| C  | 2.120258  | -0.358300 | 1.078109  |
| O  | 3.168725  | -0.578179 | 1.565732  |
| C  | 0.531379  | -1.574111 | -0.918377 |
| O  | 0.622339  | -2.494819 | -1.635765 |
| C  | 0.053615  | 1.496959  | 1.558104  |
| O  | -0.137659 | 2.384635  | 2.297096  |
| C  | 0.999547  | 1.210961  | -1.091593 |
| O  | 1.380941  | 1.943950  | -1.926424 |
| H  | -3.820192 | -0.064151 | -0.375426 |
| O  | -1.759684 | 1.098222  | -1.473623 |
| C  | -3.030216 | 1.453916  | -2.138467 |
| H  | -3.703072 | 1.955898  | -1.438341 |
| H  | -2.733042 | 2.135398  | -2.932741 |

### 4

E = -727.048043699 a.u.

Electronic Supplementary Information for Dalton Transactions  
 This journal is © The Royal Society of Chemistry 2011

H -3.506124 0.564089 -2.558837

**7**

E = -954.796525 a.u.

|    |           |           |           |
|----|-----------|-----------|-----------|
| Re | 0.868914  | -0.268873 | 0.061469  |
| C  | -0.715010 | -1.558931 | -0.612073 |
| C  | -0.694361 | 1.214785  | 0.293449  |
| C  | -2.057897 | -1.315775 | -0.748392 |
| H  | -0.442383 | -2.579872 | -0.900283 |
| C  | -2.058315 | 1.098814  | 0.037090  |
| C  | -2.676337 | -0.065132 | -0.440798 |
| H  | -2.708938 | -2.107289 | -1.110253 |
| H  | -2.739807 | 1.927375  | 0.197433  |
| C  | 2.215184  | 1.030435  | 0.700711  |
| O  | 3.008420  | 1.808346  | 1.082607  |
| C  | 0.500619  | -0.861002 | 1.920743  |
| O  | 0.255978  | -1.207178 | 3.012805  |
| C  | 1.098484  | 0.353749  | -1.810158 |
| O  | 1.205821  | 0.723579  | -2.916491 |
| C  | 2.169846  | -1.713459 | -0.200583 |
| O  | 2.924339  | -2.602552 | -0.369722 |
| O  | -4.027773 | 0.103769  | -0.602740 |
| O  | -0.226201 | 2.418272  | 0.759912  |
| C  | -1.102943 | 3.578692  | 0.996815  |
| H  | -1.855364 | 3.345736  | 1.755666  |
| H  | -0.430895 | 4.355146  | 1.356851  |
| H  | -1.585078 | 3.894617  | 0.067306  |
| C  | -4.893136 | -0.968825 | -1.090693 |
| H  | -5.887885 | -0.527020 | -1.106733 |
| H  | -4.603705 | -1.276764 | -2.099166 |
| H  | -4.874760 | -1.825764 | -0.411774 |

**8**

E = -841.52641146 a.u.

|    |           |           |           |
|----|-----------|-----------|-----------|
| Re | -0.000030 | -0.443782 | 0.023994  |
| C  | 0.730913  | 1.443408  | 1.210045  |
| C  | 1.155638  | 1.689350  | -0.132875 |
| C  | -0.000083 | 1.725885  | -0.990724 |
| C  | -1.155827 | 1.689398  | -0.132824 |
| C  | -0.731139 | 1.443514  | 1.210075  |
| H  | 1.351754  | 1.399466  | 2.089543  |
| H  | -1.351968 | 1.399164  | 2.089566  |
| C  | 1.361433  | -1.411688 | -0.904192 |
| O  | 2.239763  | -1.954249 | -1.481109 |
| C  | -1.362049 | -1.412342 | -0.902775 |
| O  | -2.240660 | -1.955432 | -1.478774 |
| C  | 0.000990  | -1.707700 | 1.451059  |
| O  | 0.001580  | -2.440638 | 2.380293  |
| O  | -2.414258 | 1.887373  | -0.624061 |
| C  | -3.543697 | 1.598869  | 0.259351  |
| H  | -3.523706 | 2.250486  | 1.139017  |
| H  | -4.429174 | 1.804953  | -0.338250 |
| H  | -3.528361 | 0.547132  | 0.564176  |
| H  | -0.000205 | 1.937685  | -2.046509 |
| O  | 2.414097  | 1.887512  | -0.623989 |
| C  | 3.543620  | 1.598897  | 0.259384  |
| H  | 3.528103  | 0.547227  | 0.564384  |
| H  | 4.429026  | 1.804719  | -0.338404 |
| H  | 3.523800  | 2.250717  | 1.138879  |

**9**

E = -954.798171 a.u.

|    |           |           |           |
|----|-----------|-----------|-----------|
| Re | 0.024828  | -0.499245 | 0.000562  |
| C  | 1.114142  | 0.315083  | -1.724106 |
| C  | 1.680340  | 0.240015  | 1.224096  |
| C  | 2.257718  | 1.133156  | -1.639464 |
| C  | 2.747585  | 1.039831  | 0.844594  |
| C  | 2.967376  | 1.446400  | -0.485576 |
| H  | 2.638429  | 1.519154  | -2.582209 |
| H  | 3.475912  | 1.378615  | 1.575578  |
| C  | -0.778414 | -1.125489 | 1.689993  |
| O  | -1.267659 | -1.503172 | 2.686464  |
| C  | -0.799228 | 1.298194  | 0.184392  |
| O  | -1.254685 | 2.371960  | 0.282263  |
| C  | 1.022513  | -2.196738 | -0.237286 |

|   |           |           |           |
|---|-----------|-----------|-----------|
| O | 1.637426  | -3.182326 | -0.387085 |
| C | -1.543573 | -1.183930 | -0.949103 |
| O | -2.525414 | -1.621277 | -1.438151 |
| O | 1.561605  | -0.140441 | 2.542241  |
| C | 2.537542  | 0.258836  | 3.567278  |
| H | 2.560670  | 1.347298  | 3.675478  |
| H | 2.175015  | -0.203259 | 4.483581  |
| H | 3.534305  | -0.118357 | 3.320294  |
| H | 3.840513  | 2.079342  | -0.638501 |
| O | 0.809829  | 0.172535  | -3.054999 |
| C | -0.276455 | -0.638566 | -3.586952 |
| H | -1.243237 | -0.184944 | -3.362667 |
| H | -0.110144 | -0.642603 | -4.663829 |
| H | -0.233461 | -1.657156 | -3.198455 |

**10**

E = -841.52261845 a.u.

|    |           |           |           |
|----|-----------|-----------|-----------|
| Re | 0.624836  | -0.016373 | -0.058764 |
| C  | -0.108698 | -0.336345 | -2.241986 |
| C  | -0.840139 | -1.278171 | -1.423431 |
| C  | -1.742118 | -0.518312 | -0.597794 |
| C  | -1.509778 | 0.881076  | -0.836669 |
| C  | -0.501995 | 0.984807  | -1.868729 |
| H  | 0.585588  | -0.597054 | -3.025046 |
| H  | -0.806539 | -2.351590 | -1.511785 |
| H  | -0.177820 | 1.913214  | -2.310564 |
| C  | 2.340485  | -0.812380 | -0.298366 |
| O  | 3.388313  | -1.323279 | -0.497605 |
| C  | 0.481656  | -0.763562 | 1.690589  |
| O  | 0.309464  | -1.260409 | 2.752207  |
| C  | 1.414223  | 1.575733  | 0.641199  |
| O  | 1.867800  | 2.592796  | 1.038251  |
| O  | -2.227288 | 1.965311  | -0.401720 |
| C  | -2.628446 | 2.017581  | 1.012237  |
| H  | -1.736768 | 1.973886  | 1.648066  |
| H  | -3.128929 | 2.978004  | 1.123243  |
| H  | -3.303663 | 1.195108  | 1.252009  |
| O  | -2.724247 | -0.963604 | 0.245167  |
| C  | -2.730979 | -2.385221 | 0.598631  |
| H  | -1.806389 | -2.652004 | 1.119747  |
| H  | -3.585072 | -2.505635 | 1.261971  |
| H  | -2.860703 | -3.003712 | -0.294854 |

**11**

E = -1069.295904 a.u.

|    |           |           |           |
|----|-----------|-----------|-----------|
| Re | -0.627253 | 0.442860  | 0.282374  |
| C  | 1.438230  | 0.054216  | 0.793175  |
| C  | 0.161530  | 1.584146  | -1.380692 |
| C  | 2.594167  | 0.482814  | 0.148219  |
| C  | 1.485716  | 1.800706  | -1.724226 |
| C  | 2.587062  | 1.286476  | -1.009538 |
| H  | 1.765254  | 2.395032  | -2.587172 |
| C  | -2.463778 | 0.870840  | -0.290546 |
| O  | -3.556804 | 1.128633  | -0.636010 |
| C  | -0.593178 | -1.165821 | -0.878240 |
| O  | -0.549981 | -2.108402 | -1.573257 |
| C  | -0.539303 | 2.091498  | 1.382527  |
| O  | -0.464300 | 3.070995  | 2.021533  |
| C  | -1.215447 | -0.622354 | 1.831134  |
| O  | -1.562173 | -1.258936 | 2.756607  |
| O  | -0.821193 | 2.145894  | -2.166622 |
| O  | 1.574622  | -0.728859 | 1.918149  |
| C  | -0.509382 | 2.961719  | -3.349454 |
| H  | 0.040992  | 2.375281  | -4.091421 |
| H  | -1.481373 | 3.251772  | -3.744180 |
| H  | 0.065377  | 3.849372  | -3.068277 |
| C  | 2.882128  | -1.126082 | 2.459425  |
| H  | 3.439672  | -1.723588 | 1.731277  |
| H  | 3.463958  | -0.247615 | 2.755797  |
| H  | 2.642658  | -1.728826 | 3.333443  |
| H  | 3.562433  | 0.196178  | 0.538194  |
| O  | 3.775657  | 1.671382  | -1.592368 |
| C  | 5.066032  | 1.270887  | -1.046018 |
| H  | 5.176464  | 0.182042  | -1.054400 |
| H  | 5.797865  | 1.722343  | -1.713843 |
| H  | 5.200785  | 1.656838  | -0.030768 |

## 12

E = -955.99928500 a.u.

|    |           |           |           |
|----|-----------|-----------|-----------|
| Re | -0.299330 | -0.500350 | 0.051051  |
| C  | 1.227315  | 1.369814  | 0.169490  |
| C  | 1.289620  | 0.854825  | -1.162901 |
| C  | -0.027061 | 0.987810  | -1.760244 |
| C  | -0.855976 | 1.674421  | -0.818164 |
| C  | -0.134928 | 1.825536  | 0.417973  |
| H  | -0.473338 | 2.341621  | 1.300378  |
| C  | 0.045869  | -1.198065 | 1.791997  |
| O  | 0.291859  | -1.572340 | 2.890213  |
| C  | 0.217989  | -2.147931 | -0.768263 |
| O  | 0.573298  | -3.133786 | -1.315644 |
| C  | -2.120739 | -1.067566 | 0.143240  |
| O  | -3.267159 | -1.358049 | 0.182745  |
| O  | -2.113142 | 2.106579  | -1.137382 |
| C  | -2.987040 | 2.545920  | -0.050112 |
| H  | -2.554703 | 3.405167  | 0.473151  |
| H  | -3.916225 | 2.835896  | -0.536252 |
| H  | -3.167999 | 1.723249  | 0.649250  |
| H  | -0.269407 | 0.774445  | -2.787490 |
| O  | 2.369105  | 0.456366  | -1.902444 |
| C  | 3.469557  | -0.248772 | -1.228350 |
| H  | 3.084799  | -1.153407 | -0.745130 |
| H  | 4.160013  | -0.509361 | -2.028430 |
| H  | 3.946898  | 0.397653  | -0.491435 |
| O  | 2.345030  | 1.555159  | 0.951891  |
| C  | 2.152229  | 1.729960  | 2.392127  |
| H  | 3.156064  | 1.833544  | 2.800153  |
| H  | 1.573809  | 2.636090  | 2.599473  |
| H  | 1.656876  | 0.854231  | 2.821684  |

## 13

E = -859.748974 a.u.

|    |           |           |           |
|----|-----------|-----------|-----------|
| Re | -0.990148 | -0.023164 | 0.177098  |
| C  | 0.547750  | 1.132026  | -0.794835 |
| C  | 0.673997  | -1.242019 | 0.800686  |
| C  | 1.905670  | 0.968426  | -0.850165 |
| H  | 0.218868  | 2.016348  | -1.352369 |
| C  | 2.017410  | -1.132438 | 0.561541  |
| H  | 0.438437  | -2.114776 | 1.420224  |
| C  | 2.648111  | -0.095829 | -0.219111 |
| H  | 2.485672  | 1.694332  | -1.411256 |
| H  | 2.675299  | -1.883259 | 0.987713  |
| C  | -2.252928 | -1.192967 | 1.128364  |
| O  | -2.980442 | -1.913873 | 1.712615  |
| C  | -0.697608 | 1.084476  | 1.797371  |
| O  | -0.485369 | 1.735602  | 2.748794  |
| C  | -1.098710 | -1.134636 | -1.463225 |
| O  | -1.124711 | -1.790825 | -2.434295 |
| C  | -2.381364 | 1.199676  | -0.484168 |
| O  | -3.188527 | 1.953623  | -0.896956 |
| N  | 4.002501  | -0.123121 | -0.367078 |
| C  | 4.714265  | 0.900339  | -1.160877 |
| H  | 4.571326  | 1.900054  | -0.738593 |
| H  | 5.779288  | 0.673110  | -1.152832 |
| H  | 4.370317  | 0.904306  | -2.199811 |
| C  | 4.827653  | -1.177439 | 0.258930  |
| H  | 4.715313  | -1.173043 | 1.347538  |
| H  | 4.558205  | -2.168694 | -0.119133 |
| H  | 5.874123  | -0.991924 | 0.021287  |

## 14

E = -746.502188 a.u.

|    |           |           |           |
|----|-----------|-----------|-----------|
| Re | -0.404742 | -0.091417 | -0.000187 |
| C  | 0.555187  | -1.929513 | 1.069492  |
| C  | 0.323557  | -2.289448 | -0.287389 |
| C  | 1.179756  | -1.471913 | -1.122510 |
| C  | 2.040548  | -0.693501 | -0.257889 |
| C  | 1.557976  | -0.884185 | 1.093117  |
| H  | 0.094474  | -2.373964 | 1.937938  |
| H  | -0.345783 | -3.058112 | -0.641125 |
| H  | 1.265154  | -1.559569 | -2.192858 |
| H  | 1.978408  | -0.451171 | 1.985507  |

|   |           |           |           |
|---|-----------|-----------|-----------|
| C | -1.487001 | 0.476104  | 1.465251  |
| O | -2.128735 | 0.788945  | 2.409243  |
| C | -1.931354 | -0.214453 | -1.138246 |
| O | -2.857937 | -0.344260 | -1.863097 |
| C | -0.089742 | 1.714583  | -0.533002 |
| O | 0.191465  | 2.814943  | -0.872907 |
| N | 3.076339  | 0.111216  | -0.648163 |
| C | 3.662794  | 1.044332  | 0.319126  |
| H | 4.597932  | 1.434771  | -0.086736 |
| H | 2.992295  | 1.889539  | 0.536644  |
| H | 3.890874  | 0.526561  | 1.254422  |
| C | 3.254506  | 0.409886  | -2.072707 |
| H | 4.233988  | 0.869063  | -2.219067 |
| H | 3.222631  | -0.511676 | -2.659725 |
| H | 2.482448  | 1.097264  | -2.450458 |

## 15

E = -859.751488 a.u.

|    |           |           |           |
|----|-----------|-----------|-----------|
| Re | 0.480670  | 0.002706  | 0.279786  |
| C  | -1.702627 | -0.011465 | -0.150439 |
| C  | 0.036965  | -1.514958 | 1.784001  |
| C  | -2.415388 | -1.273763 | -0.041397 |
| C  | -1.029399 | -2.360939 | 1.781478  |
| C  | -2.108109 | -2.289255 | 0.828717  |
| H  | -3.325158 | -1.411324 | -0.618806 |
| H  | -1.107440 | -3.159034 | 2.521296  |
| C  | 2.364163  | -0.199640 | 0.772179  |
| O  | 3.487409  | -0.335768 | 1.095919  |
| C  | 0.605447  | -1.509580 | -1.004006 |
| O  | 0.661609  | -2.421998 | -1.734569 |
| C  | 0.202510  | 1.357623  | 1.691995  |
| O  | 0.009507  | 2.136359  | 2.548855  |
| C  | 0.953000  | 1.279738  | -1.133879 |
| O  | 1.277515  | 2.030262  | -1.986860 |
| H  | -2.805856 | -3.126607 | 0.841423  |
| N  | -2.451386 | 1.020325  | -0.597460 |
| C  | -1.971979 | 2.408782  | -0.728466 |
| H  | -2.024715 | 2.729459  | -1.774836 |
| H  | -2.604860 | 3.067837  | -0.124344 |
| H  | -0.950878 | 2.492612  | -0.380073 |
| C  | -3.889389 | 0.884247  | -0.959672 |
| H  | -4.014162 | 0.255000  | -1.846505 |
| H  | -4.457070 | 0.452109  | -0.131930 |
| H  | -4.288471 | 1.873807  | -1.181394 |
| H  | 0.770108  | -1.691976 | 2.576426  |

## 16

E = -1163.265626 a.u.

|    |           |           |           |
|----|-----------|-----------|-----------|
| Re | -0.951764 | 0.001420  | 0.017402  |
| C  | 0.502407  | 0.047124  | -1.563216 |
| C  | 0.765303  | -0.007349 | 1.298968  |
| C  | 1.878801  | 0.042381  | -1.513005 |
| H  | 0.126766  | 0.074807  | -2.592298 |
| C  | 2.115441  | -0.005879 | 1.004212  |
| H  | 0.583805  | -0.017700 | 2.380276  |
| C  | 2.638856  | 0.014486  | -0.311581 |
| H  | 2.451567  | 0.062701  | -2.440503 |
| H  | 2.828541  | -0.016765 | 1.824284  |
| C  | -2.141784 | -0.043499 | 1.588596  |
| O  | -2.821118 | -0.070194 | 2.549850  |
| C  | -0.926924 | 1.990279  | 0.048440  |
| O  | -0.889978 | 3.159973  | 0.064544  |
| C  | -0.880903 | -1.985913 | -0.031562 |
| O  | -0.815904 | -3.154043 | -0.062508 |
| C  | -2.413123 | 0.011536  | -1.308809 |
| O  | -3.258448 | 0.018586  | -2.127483 |
| S  | 4.427658  | 0.014561  | -0.614609 |
| C  | 5.229279  | -0.038084 | 1.091347  |
| H  | 6.300864  | -0.049905 | 0.889035  |
| H  | 4.970178  | 0.852556  | 1.663852  |
| H  | 4.942284  | -0.946684 | 1.620658  |

## 17

E = -1050.027139 a.u.

|    |           |           |           |
|----|-----------|-----------|-----------|
| Re | -0.391391 | -0.073538 | -0.002708 |
|----|-----------|-----------|-----------|

Electronic Supplementary Information for Dalton Transactions  
 This journal is © The Royal Society of Chemistry 2011

|   |           |           |           |
|---|-----------|-----------|-----------|
| C | 0.477377  | -2.004839 | 1.038024  |
| C | 0.185304  | -2.345322 | -0.315659 |
| C | 1.053299  | -1.568355 | -1.171076 |
| C | 1.913322  | -0.787492 | -0.326612 |
| C | 1.538268  | -1.021756 | 1.038498  |
| H | 0.013666  | -2.425775 | 1.917058  |
| H | -0.541631 | -3.070118 | -0.648503 |
| H | 1.111628  | -1.626934 | -2.246502 |
| H | 2.020018  | -0.616264 | 1.913366  |
| C | -1.411499 | 0.513506  | 1.497527  |
| O | -2.011931 | 0.829897  | 2.465617  |
| C | -1.951683 | -0.108216 | -1.099132 |
| O | -2.900410 | -0.189017 | -1.798912 |
| C | -0.045316 | 1.734422  | -0.506812 |
| O | 0.248925  | 2.836365  | -0.818719 |
| C | 3.597289  | 1.425243  | 0.410757  |
| H | 3.878231  | 0.917142  | 1.333625  |
| H | 4.424772  | 2.047036  | 0.067251  |
| H | 2.704751  | 2.035872  | 0.548055  |
| S | 3.314807  | 0.173802  | -0.976463 |

**18**

E = -1163.275383 a.u.

|    |           |           |           |
|----|-----------|-----------|-----------|
| Re | -0.589678 | -0.089235 | 0.050887  |
| C  | -0.803907 | 1.791719  | -0.968985 |
| C  | 1.545286  | 0.326926  | -0.001974 |
| C  | 0.163546  | 2.689304  | -1.369328 |
| H  | -1.819522 | 2.115233  | -1.222036 |
| C  | 2.200485  | 1.440937  | -0.542869 |
| C  | 1.552465  | 2.510379  | -1.163518 |
| H  | -0.127966 | 3.606777  | -1.880832 |
| H  | 3.284316  | 1.512221  | -0.494985 |
| C  | -0.421722 | -1.826030 | 0.995248  |
| O  | -0.394199 | -2.860614 | 1.553262  |
| C  | -0.662816 | 0.879168  | 1.787165  |
| O  | -0.678258 | 1.463521  | 2.800478  |
| C  | -0.383680 | -0.991928 | -1.709886 |
| O  | -0.235324 | -1.506351 | -2.750035 |
| C  | -2.542989 | -0.240303 | -0.024565 |
| O  | -3.716647 | -0.280727 | -0.096916 |
| H  | 2.199573  | 3.304972  | -1.535047 |
| S  | 2.550749  | -0.957100 | 0.760094  |
| C  | 4.375076  | -0.447630 | 0.631526  |
| H  | 4.550249  | 0.483866  | 1.171326  |
| H  | 4.925083  | -1.260912 | 1.106714  |
| H  | 4.673837  | -0.358665 | -0.413738 |

**19**

E = -818.002116 a.u.

|    |           |           |           |
|----|-----------|-----------|-----------|
| Re | 0.236052  | 0.001238  | 0.006325  |
| C  | -1.333477 | 0.003050  | 1.445907  |
| C  | -1.332664 | 0.003362  | -1.429223 |
| C  | -2.718746 | -0.001601 | 1.270729  |
| H  | -1.052979 | 0.006976  | 2.504520  |
| C  | -2.713626 | -0.001454 | -1.248923 |
| H  | -1.053936 | 0.008338  | -2.489414 |
| C  | -3.350137 | -0.004313 | -0.002752 |
| H  | -3.367206 | -0.001663 | -2.120189 |
| H  | -4.438736 | -0.007217 | -0.001257 |
| C  | 1.564774  | -0.001180 | -1.461578 |
| O  | 2.319689  | -0.002533 | -2.361119 |
| C  | 0.244717  | 1.997036  | 0.002421  |
| O  | 0.242599  | 3.164822  | -0.002427 |
| C  | 0.237960  | -1.994614 | 0.002961  |
| O  | 0.232301  | -3.162374 | -0.002479 |
| C  | 1.566873  | -0.000844 | 1.477516  |
| O  | 2.326221  | -0.001977 | 2.372586  |
| C  | -3.582485 | -0.002299 | 2.424791  |
| N  | -4.279572 | -0.002896 | 3.370309  |

**20**

E = -704.773857 a.u.

|    |           |           |           |
|----|-----------|-----------|-----------|
| Re | 0.089581  | -0.047021 | 0.026136  |
| C  | -1.928843 | -1.161230 | -0.597122 |
| C  | -1.904675 | -1.079164 | 0.823544  |

|   |           |           |           |
|---|-----------|-----------|-----------|
| C | -1.951495 | 0.320463  | 1.197346  |
| C | -2.003503 | 1.090570  | -0.029459 |
| C | -1.990057 | 0.182745  | -1.125496 |
| H | -1.934030 | -2.070429 | -1.177897 |
| H | -1.887156 | -1.906331 | 1.516671  |
| H | -2.072600 | 2.166278  | -0.084380 |
| H | -2.048926 | 0.450481  | -2.168961 |
| C | 1.155744  | -0.583935 | -1.460678 |
| O | 1.756590  | -0.932380 | -2.415010 |
| C | 1.254257  | -0.980593 | 1.219807  |
| O | 1.923205  | -1.581880 | 1.982026  |
| C | 1.139618  | 1.537080  | 0.228368  |
| O | 1.735104  | 2.546564  | 0.356284  |
| C | -2.086192 | 0.831921  | 2.513886  |
| N | -2.221352 | 1.253678  | 3.601504  |

**21**

E = -817.999436 a.u.

|    |           |           |           |
|----|-----------|-----------|-----------|
| Re | 0.238089  | -0.000035 | 0.000034  |
| C  | -1.336826 | -0.000294 | 1.434279  |
| C  | -1.336902 | 0.000416  | -1.434122 |
| C  | -2.713171 | -0.000283 | 1.262937  |
| H  | -1.057894 | -0.000662 | 2.493900  |
| C  | -2.713240 | 0.000411  | -1.262723 |
| H  | -1.058007 | 0.000669  | -2.493753 |
| C  | -3.355403 | 0.000049  | 0.000124  |
| H  | -3.367783 | -0.000528 | 2.132640  |
| H  | -3.367884 | 0.000680  | -2.132399 |
| C  | 1.561785  | 0.000155  | -1.474087 |
| O  | 2.312961  | 0.000301  | -2.377006 |
| C  | 0.242314  | 1.995351  | -0.000150 |
| O  | 0.236203  | 3.163431  | -0.000572 |
| C  | 0.242216  | -1.995424 | -0.000455 |
| O  | 0.236487  | -3.163505 | -0.000988 |
| C  | 1.561521  | -0.000356 | 1.474380  |
| O  | 2.312330  | -0.000577 | 2.377601  |
| C  | -4.792161 | 0.000095  | 0.000165  |
| N  | -5.966590 | 0.000132  | 0.000186  |

**22**

E = -818.008467 a.u.

|    |           |           |           |
|----|-----------|-----------|-----------|
| Re | 0.244613  | 0.000269  | 0.028780  |
| C  | -1.374746 | 0.000705  | 1.484380  |
| C  | -1.309965 | 0.001437  | -1.420917 |
| C  | -2.747245 | -0.001326 | 1.254195  |
| C  | -2.694427 | -0.000579 | -1.263254 |
| H  | -1.015516 | 0.003440  | -2.476885 |
| C  | -3.345938 | -0.002225 | -0.022650 |
| H  | -3.425035 | -0.001681 | 2.105968  |
| H  | -3.333064 | -0.000453 | -2.145890 |
| H  | -4.434861 | -0.003326 | -0.039502 |
| C  | 1.537264  | 0.000149  | -1.450232 |
| O  | 2.267854  | 0.000161  | -2.370949 |
| C  | 0.237329  | 1.994934  | 0.057317  |
| O  | 0.221509  | 3.162635  | 0.077230  |
| C  | 0.234642  | -1.994398 | 0.055221  |
| O  | 0.217719  | -3.162104 | 0.074020  |
| C  | 1.652745  | -0.001639 | 1.439980  |
| O  | 2.498887  | -0.002798 | 2.250004  |
| C  | -0.993678 | 0.002587  | 2.857990  |
| N  | -0.614391 | 0.004262  | 3.975036  |

**23**

E = -930.213854 a.u.

|   |           |           |           |
|---|-----------|-----------|-----------|
| C | -1.270911 | 0.539220  | 0.315439  |
| C | -0.002934 | -1.820333 | -0.734388 |
| C | -2.397628 | -0.214899 | 0.069391  |
| H | -1.514779 | 1.521413  | 0.726890  |
| C | -1.320602 | -2.268558 | -0.839217 |
| H | 0.715912  | -2.571510 | -1.081992 |
| C | -2.439326 | -1.519846 | -0.465015 |
| H | -1.519039 | -3.262950 | -1.235599 |
| H | -3.425397 | -1.957258 | -0.587702 |
| C | 2.605400  | -0.597899 | -0.404577 |
| O | 3.680023  | -0.999680 | -0.654286 |

Electronic Supplementary Information for Dalton Transactions  
 This journal is © The Royal Society of Chemistry 2011

|    |           |           |           |
|----|-----------|-----------|-----------|
| C  | 0.658562  | 0.817172  | -1.843426 |
| O  | 0.590179  | 1.277265  | -2.914147 |
| C  | 0.893374  | -0.764631 | 1.816092  |
| O  | 0.962924  | -1.231759 | 2.883710  |
| C  | 1.317509  | 1.787957  | 0.716312  |
| O  | 1.611688  | 2.834651  | 1.156444  |
| N  | -3.734494 | 0.379744  | 0.386852  |
| O  | -4.765334 | -0.319211 | 0.165550  |
| O  | -3.771200 | 1.548358  | 0.859874  |
| Re | 0.768017  | 0.024669  | -0.013754 |

**24**

E = -816.976579 a.u.

|    |           |           |           |
|----|-----------|-----------|-----------|
| C  | 0.394950  | 2.173235  | -0.725831 |
| C  | 0.394463  | 2.173871  | 0.724269  |
| C  | 1.277051  | 1.152747  | 1.173307  |
| C  | 1.811775  | 0.512132  | 0.000399  |
| C  | 1.277808  | 1.151748  | -1.173450 |
| H  | -0.153490 | 2.855016  | -1.357036 |
| H  | -0.154335 | 2.856210  | 1.354554  |
| H  | 1.535432  | 0.904155  | 2.190058  |
| H  | 1.536863  | 0.902318  | -2.189821 |
| C  | -2.347854 | 0.557766  | -0.002414 |
| O  | -3.469622 | 0.922589  | -0.003681 |
| C  | -0.832076 | -1.230999 | 1.356705  |
| O  | -0.991030 | -2.015657 | 2.220393  |
| C  | -0.829403 | -1.234118 | -1.354756 |
| O  | -0.986640 | -2.020795 | -2.216915 |
| N  | 2.847528  | -0.485440 | 0.001143  |
| O  | 3.273336  | -0.887114 | -1.120388 |
| O  | 3.273090  | -0.885720 | 1.123265  |
| Re | -0.501513 | 0.076383  | -0.000198 |

**25**

E = -930.203547 a.u.

|    |           |           |           |
|----|-----------|-----------|-----------|
| C  | 0.693616  | 1.214176  | -0.758639 |
| C  | 0.693243  | -1.214301 | 0.758525  |
| C  | 2.074493  | 1.069823  | -0.668097 |
| H  | 0.418238  | 2.117424  | -1.314017 |
| C  | 2.074163  | -1.070810 | 0.667285  |
| H  | 0.417581  | -2.117297 | 1.314172  |
| C  | 2.681167  | -0.000684 | -0.000558 |
| H  | 2.739548  | -1.799888 | 1.117782  |
| C  | -2.196677 | -1.242194 | 0.807907  |
| O  | -2.941602 | -2.000607 | 1.305381  |
| C  | -0.900183 | 1.083141  | 1.678475  |
| O  | -0.910603 | 1.716666  | 2.658980  |
| C  | -0.901631 | -1.082266 | -1.677814 |
| O  | -0.912903 | -1.715771 | -2.658325 |
| C  | -2.196324 | 1.243819  | -0.806619 |
| O  | -2.941032 | 2.002675  | -1.303745 |
| H  | 2.740100  | 1.798505  | -1.118902 |
| N  | 4.185278  | -0.001183 | -0.000931 |
| O  | 4.777436  | 0.990092  | -0.506881 |
| O  | 4.776990  | -0.992849 | 0.504772  |
| Re | -0.876840 | 0.000421  | 0.000328  |

**26**

E = -930.214705 a.u.

|   |           |           |           |
|---|-----------|-----------|-----------|
| C | 1.544549  | 0.480765  | 0.177159  |
| C | -0.749905 | 1.899422  | -0.756551 |
| C | 2.161053  | 1.708312  | 0.043918  |
| C | 0.144661  | 2.972238  | -0.764022 |
| H | -1.737720 | 2.184900  | -1.136164 |
| C | 1.486791  | 2.875007  | -0.380568 |
| H | -0.192886 | 3.948168  | -1.110297 |
| H | 2.089578  | 3.778995  | -0.446722 |
| C | -2.416535 | -0.381098 | -0.411212 |
| O | -3.556983 | -0.511085 | -0.659197 |
| C | -0.041290 | -0.819100 | -1.849500 |
| O | 0.225713  | -1.249032 | -2.899317 |
| C | -0.927760 | 0.590514  | 1.782858  |
| O | -1.169606 | 0.994390  | 2.851451  |
| C | -0.208938 | -1.905017 | 0.722275  |
| O | -0.057418 | -2.968733 | 1.185115  |

|    |           |           |           |
|----|-----------|-----------|-----------|
| H  | 3.224239  | 1.789864  | 0.253270  |
| N  | 2.544425  | -0.578044 | 0.510759  |
| O  | 2.514254  | -1.640096 | -0.173062 |
| O  | 3.354325  | -0.364046 | 1.455542  |
| Re | -0.503486 | -0.083894 | -0.045261 |

**27**

E = -848.849927 a.u.

|    |           |           |           |
|----|-----------|-----------|-----------|
| Re | -0.606847 | 0.027443  | -0.000288 |
| C  | 1.450416  | 0.628531  | -0.001248 |
| C  | 0.186067  | -1.958312 | 0.017558  |
| C  | 2.644363  | -0.103006 | 0.002568  |
| H  | 1.617919  | 1.713954  | -0.006384 |
| C  | 1.505918  | -2.378892 | 0.019567  |
| H  | -0.524446 | -2.793116 | 0.025526  |
| C  | 2.625042  | -1.520634 | 0.012077  |
| H  | 1.725557  | -3.447008 | 0.027991  |
| H  | 3.593533  | -2.020753 | 0.014938  |
| C  | -2.442501 | -0.704598 | 0.002025  |
| O  | -3.519418 | -1.177842 | 0.003809  |
| C  | -0.582922 | 0.030554  | 1.990412  |
| O  | -0.551359 | 0.024310  | 3.159869  |
| C  | -0.574024 | -0.004036 | -1.990594 |
| O  | -0.536927 | -0.030741 | -3.159588 |
| C  | -1.156922 | 1.925598  | -0.017796 |
| O  | -1.444915 | 3.066343  | -0.028082 |
| Si | 4.298385  | 0.841621  | -0.003435 |
| C  | 5.743122  | -0.371825 | -0.004491 |
| H  | 6.693916  | 0.175945  | -0.009283 |
| H  | 5.739527  | -1.013151 | 0.885894  |
| H  | 5.733507  | -1.018369 | -0.891052 |
| C  | 4.382144  | 1.929575  | 1.534926  |
| H  | 3.533782  | 2.623852  | 1.580004  |
| H  | 4.366575  | 1.324820  | 2.449837  |
| H  | 5.301525  | 2.528863  | 1.542329  |
| C  | 4.374719  | 1.922842  | -1.546882 |
| H  | 4.354067  | 1.314146  | -2.459074 |
| H  | 3.526686  | 2.617591  | -1.590657 |
| H  | 5.294464  | 2.521431  | -1.561572 |

**28**

E = -735.633027 a.u.

|    |           |           |           |
|----|-----------|-----------|-----------|
| Re | -0.372206 | -0.076213 | 0.000377  |
| C  | 0.553291  | -2.148168 | -0.721398 |
| C  | 1.423505  | -1.100869 | -1.153735 |
| C  | 1.995708  | -0.428242 | -0.000160 |
| C  | 1.424041  | -1.100811 | 1.153687  |
| C  | 0.553617  | -2.148142 | 0.721813  |
| H  | 0.015999  | -2.835343 | -1.357034 |
| H  | 1.639995  | -0.860374 | -2.184176 |
| H  | 1.640993  | -0.860257 | 2.184018  |
| H  | 0.016651  | -2.835312 | 1.357726  |
| C  | -2.205816 | -0.602279 | 0.000177  |
| O  | -3.321328 | -0.993291 | 0.000082  |
| C  | -0.705477 | 1.222049  | -1.355461 |
| O  | -0.848950 | 2.009503  | -2.226212 |
| C  | -0.705578 | 1.221174  | 1.357035  |
| O  | -0.849125 | 2.008049  | 2.228294  |
| Si | 3.332604  | 0.899650  | -0.000480 |
| C  | 5.004588  | 0.024913  | -0.000655 |
| H  | 5.120785  | -0.611360 | -0.886634 |
| H  | 5.825456  | 0.753433  | -0.000807 |
| H  | 5.121025  | -0.611261 | 0.885364  |
| C  | 3.166040  | 1.948475  | 1.552210  |
| H  | 3.957954  | 2.707448  | 1.585061  |
| H  | 2.201787  | 2.467925  | 1.589732  |
| H  | 3.257767  | 1.342242  | 2.462295  |
| C  | 3.165597  | 1.948221  | -1.553293 |
| H  | 2.201337  | 2.467667  | -1.590654 |
| H  | 3.957502  | 2.707189  | -1.586470 |
| H  | 3.257093  | 1.341843  | -2.463305 |

**29**

E = -848.849863 a.u.

|    |          |          |          |
|----|----------|----------|----------|
| Re | 0.699835 | 0.019419 | 0.000186 |
|----|----------|----------|----------|

Electronic Supplementary Information for Dalton Transactions  
 This journal is © The Royal Society of Chemistry 2011

|    |            |           |           |
|----|------------|-----------|-----------|
| C  | -0.888551  | -0.008935 | 1.431637  |
| C  | -0.888127  | -0.006392 | -1.431739 |
| C  | -2.262557  | -0.044003 | 1.249936  |
| H  | -0.609508  | 0.003425  | 2.492324  |
| C  | -2.262215  | -0.041754 | -1.250497 |
| H  | -0.608832  | 0.007920  | -2.492336 |
| C  | -2.937387  | -0.058114 | -0.000402 |
| H  | -2.893521  | -0.061602 | 2.139002  |
| H  | -2.892917  | -0.057744 | -2.139771 |
| C  | 2.024622   | 0.042973  | -1.465820 |
| O  | 2.781406   | 0.056896  | -2.366708 |
| C  | 0.631482   | 2.008526  | 0.002134  |
| O  | 0.570201   | 3.177027  | 0.003646  |
| C  | 0.698223   | -1.971022 | -0.000664 |
| O  | 0.675569   | -3.140849 | -0.000657 |
| C  | 2.025022   | 0.040675  | 1.465920  |
| O  | 2.782454   | 0.053162  | 2.366287  |
| Si | -4.853253  | -0.028127 | -0.000447 |
| C  | -5.371389  | 1.785351  | 0.003754  |
| H  | -4.990084  | 2.308907  | -0.880890 |
| H  | -6.4465316 | 1.873852  | 0.003698  |
| H  | -4.990547  | 2.304432  | 0.891237  |
| C  | -5.504795  | -0.899532 | 1.536744  |
| H  | -5.227114  | -0.376452 | 2.459117  |
| H  | -6.600837  | -0.944790 | 1.502390  |
| H  | -5.130750  | -1.928033 | 1.605469  |
| C  | -5.504896  | -0.892768 | -1.541391 |
| H  | -6.600954  | -0.937787 | -1.507301 |
| H  | -5.226981  | -0.365901 | -2.461533 |
| H  | -5.131218  | -1.921106 | -1.614420 |

**30**

E = -848.848503 a.u.

|    |           |           |           |
|----|-----------|-----------|-----------|
| Re | -0.461967 | -0.142459 | 0.029015  |
| C  | 1.654832  | 0.492502  | -0.039602 |
| C  | 0.281411  | -2.145588 | 0.126889  |
| C  | 2.734319  | -0.380460 | -0.176481 |
| C  | 1.574011  | -2.623849 | -0.028794 |
| H  | -0.447157 | -2.947447 | 0.295218  |
| C  | 2.694786  | -1.792496 | -0.182925 |
| H  | 3.742160  | 0.028855  | -0.253658 |
| H  | 1.762335  | -3.697044 | -0.001920 |
| H  | 3.659087  | -2.292866 | -0.279983 |
| C  | -2.252989 | -0.941836 | 0.061903  |
| O  | -3.301986 | -1.474963 | 0.082498  |
| C  | -0.377727 | -0.020314 | 2.010748  |
| O  | -0.291705 | 0.055507  | 3.175846  |
| C  | -0.339142 | -0.219522 | -1.953324 |
| O  | -0.217749 | -0.259799 | -3.116507 |
| C  | -1.240061 | 1.671772  | -0.074676 |
| O  | -1.782216 | 2.716980  | -0.131875 |
| Si | 2.135519  | 2.342261  | 0.018363  |
| C  | 1.523060  | 3.192014  | -1.553921 |
| H  | 1.900905  | 4.222594  | -1.578944 |
| H  | 1.897247  | 2.679417  | -2.448521 |
| H  | 0.432061  | 3.238591  | -1.616841 |
| C  | 4.013016  | 2.563377  | 0.090103  |
| H  | 4.249410  | 3.633122  | 0.158927  |
| H  | 4.453835  | 2.072243  | 0.966389  |
| H  | 4.513161  | 2.175847  | -0.806013 |
| C  | 1.414679  | 3.156392  | 1.562064  |
| H  | 1.675832  | 2.594425  | 2.467023  |
| H  | 1.837398  | 4.164402  | 1.665553  |
| H  | 0.326342  | 3.259592  | 1.524892  |

**31**

E = -738.765946 a.u.

|    |           |           |           |
|----|-----------|-----------|-----------|
| Re | 0.143301  | -0.015489 | 0.168535  |
| C  | -1.097563 | 0.355929  | -1.511503 |
| C  | -1.558464 | 0.543651  | 1.296153  |
| C  | -2.447268 | 0.690684  | -1.580242 |
| H  | -0.652487 | 0.253924  | -2.510293 |
| C  | -2.850531 | 0.870735  | 0.888415  |
| H  | -1.446265 | 0.616889  | 2.386112  |
| C  | -3.258799 | 0.931827  | -0.455028 |
| H  | -2.921679 | 0.818463  | -2.554416 |

|   |           |           |           |
|---|-----------|-----------|-----------|
| H | -3.601620 | 1.130522  | 1.635729  |
| H | -4.293552 | 1.218380  | -0.645257 |
| C | 1.058061  | -0.471517 | 1.845302  |
| O | 1.552851  | -0.763486 | 2.879155  |
| C | 0.837260  | 1.803230  | 0.252140  |
| O | 1.266984  | 2.898334  | 0.299987  |
| C | 1.600055  | -0.541146 | -1.042828 |
| O | 2.439536  | -0.871942 | -1.808080 |
| P | -0.599015 | -2.408948 | 0.011345  |
| C | -2.239933 | -2.817047 | 0.762314  |
| H | -2.207754 | -2.615759 | 1.837134  |
| H | -3.007826 | -2.177480 | 0.319006  |
| H | -2.496022 | -3.869300 | 0.596926  |
| C | 0.536869  | -3.642072 | 0.799748  |
| H | 1.524715  | -3.574492 | 0.333277  |
| H | 0.648045  | -3.419069 | 1.864999  |
| H | 0.152986  | -4.661440 | 0.682933  |
| C | -0.762487 | -3.069229 | -1.712117 |
| H | -1.517994 | -2.489841 | -2.250164 |
| H | 0.191749  | -2.964750 | -2.237699 |
| H | -1.052655 | -4.125467 | -1.700743 |

**32**

E = -751.726259 a.u.

|    |           |           |           |
|----|-----------|-----------|-----------|
| Re | 0.124840  | -0.000097 | 0.001557  |
| C  | -1.441013 | 0.375155  | -1.357134 |
| C  | -1.437085 | -0.384610 | 1.362310  |
| C  | -2.829095 | 0.334050  | -1.196661 |
| H  | -1.170570 | 0.695868  | -2.374339 |
| C  | -2.825595 | -0.350746 | 1.203705  |
| H  | -1.163608 | -0.704657 | 2.378900  |
| C  | -3.473101 | -0.009970 | 0.004009  |
| H  | -3.476241 | 0.580154  | -2.041322 |
| H  | -3.470284 | -0.600549 | 2.049161  |
| H  | -4.563737 | -0.012861 | 0.004755  |
| C  | 1.405766  | -0.259023 | 1.448743  |
| O  | 2.141012  | -0.408480 | 2.374165  |
| C  | 1.404786  | 0.266071  | -1.445260 |
| O  | 2.141095  | 0.419671  | -2.369193 |
| P  | 0.255382  | -2.403446 | -0.416473 |
| P  | 0.239475  | 2.404930  | 0.415296  |
| C  | 1.906682  | 3.052756  | 0.905249  |
| H  | 1.874438  | 4.133537  | 1.082985  |
| H  | 2.245037  | 2.546364  | 1.814144  |
| H  | 2.626640  | 2.839796  | 0.108828  |
| C  | -0.192232 | 3.512311  | -1.009219 |
| H  | -0.063254 | 4.567570  | -0.743155 |
| H  | 0.452012  | 3.273925  | -1.861411 |
| H  | -1.230778 | 3.334486  | -1.302177 |
| C  | -0.851087 | 3.058760  | 1.763776  |
| H  | -0.751394 | 4.145495  | 1.865362  |
| H  | -1.890115 | 2.802947  | 1.538336  |
| H  | -0.579131 | 2.578654  | 2.708750  |
| C  | 1.932086  | -3.041994 | -0.886074 |
| H  | 1.906887  | -4.122206 | -1.068434 |
| H  | 2.280880  | -2.530586 | -1.788205 |
| H  | 2.640074  | -2.829256 | -0.078923 |
| C  | -0.189928 | -3.518097 | 0.998030  |
| H  | -0.051296 | -4.571642 | 0.730074  |
| H  | 0.441246  | -3.279018 | 1.859742  |
| H  | -1.233331 | -3.346949 | 1.277395  |
| C  | -0.813574 | -3.057195 | -1.782220 |
| H  | -0.707276 | -4.143006 | -1.887015 |
| H  | -1.856793 | -2.807116 | -1.570080 |
| H  | -0.530917 | -2.571820 | -2.721374 |

**33**

E = -625.522089 a.u.

|    |          |           |           |
|----|----------|-----------|-----------|
| Re | 0.417707 | 0.190138  | -0.000025 |
| C  | 2.627131 | -0.224940 | 0.712376  |
| C  | 1.842298 | -1.346860 | 1.165469  |
| C  | 1.354607 | -2.029072 | 0.004362  |
| C  | 1.837093 | -1.353349 | -1.162959 |
| C  | 2.623941 | -0.229074 | -0.719625 |
| H  | 3.156399 | 0.473030  | 1.342226  |
| H  | 1.689821 | -1.642586 | 2.191642  |

Electronic Supplementary Information for Dalton Transactions  
 This journal is © The Royal Society of Chemistry 2011

|   |           |           |           |
|---|-----------|-----------|-----------|
| H | 0.754514  | -2.927327 | 0.008259  |
| H | 1.680528  | -1.655236 | -2.186715 |
| H | 3.150292  | 0.465397  | -1.355775 |
| C | -0.020395 | 1.434671  | 1.345030  |
| O | -0.250179 | 2.204113  | 2.228565  |
| C | -0.020500 | 1.434860  | -1.344827 |
| O | -0.250317 | 2.204416  | -2.228255 |
| P | -1.829723 | -0.543614 | -0.000016 |
| C | -2.346912 | -1.593235 | 1.443536  |
| H | -3.394178 | -1.904924 | 1.355726  |
| H | -1.712493 | -2.483319 | 1.499646  |
| H | -2.217196 | -1.021570 | 2.367721  |
| C | -3.134787 | 0.771352  | -0.002003 |
| H | -4.139867 | 0.335426  | -0.001567 |
| H | -3.012892 | 1.402758  | 0.883422  |
| H | -3.012636 | 1.400441  | -0.889039 |
| C | -2.345857 | -1.596697 | -1.441443 |
| H | -1.712452 | -2.487721 | -1.494125 |
| H | -3.393610 | -1.906933 | -1.354289 |
| H | -2.214121 | -1.027754 | -2.367015 |

34

E = -764.655509 a.u.

|    |           |           |           |
|----|-----------|-----------|-----------|
| Re | 0.000388  | -0.188112 | 0.203456  |
| C  | 0.001038  | -0.917215 | -1.805895 |
| C  | 0.001441  | -2.153736 | 0.714369  |
| C  | 0.001770  | -2.217443 | -2.292907 |
| H  | 0.001040  | -0.187264 | -2.631941 |
| C  | 0.002128  | -3.336494 | -0.067190 |
| C  | 0.001360  | -2.404361 | 1.786863  |
| H  | 0.002283  | -3.365279 | -1.457564 |
| H  | 0.002108  | -2.403520 | -3.370199 |
| H  | 0.002560  | -4.300871 | 0.445402  |
| H  | 0.002890  | -4.341024 | -1.945607 |
| C  | 0.000504  | 0.256922  | 2.067054  |
| O  | 0.000730  | 0.443346  | 3.255850  |
| P  | 2.451726  | -0.226105 | 0.170608  |
| P  | -2.451031 | -0.229697 | 0.171206  |
| P  | -0.002334 | 2.229664  | -0.596967 |
| C  | -3.336751 | 0.261413  | -1.394643 |
| H  | -4.418504 | 0.112526  | -1.298840 |
| H  | -3.145996 | 1.308590  | -1.645436 |
| H  | -2.955891 | -0.362010 | -2.209542 |
| C  | -3.389176 | 0.715127  | 1.472011  |
| H  | -3.215824 | 1.789066  | 1.374772  |
| H  | -4.465051 | 0.518392  | 1.401137  |
| H  | -3.028383 | 0.403392  | 2.457345  |
| C  | -3.186842 | -1.917332 | 0.411701  |
| H  | -2.790987 | -2.591702 | -0.351493 |
| H  | -2.891066 | -2.302617 | 1.391801  |
| H  | -4.280624 | -1.880439 | 0.346210  |
| C  | -1.398351 | 3.352917  | -0.061000 |
| H  | -1.246285 | 4.369960  | -0.440700 |
| H  | -2.359553 | 2.984585  | -0.428218 |
| H  | -1.431942 | 3.383007  | 1.032810  |
| C  | 1.394518  | 3.354805  | -0.067063 |
| H  | 2.354888  | 2.986660  | -0.436617 |
| H  | 1.240432  | 4.371129  | -0.447870 |
| H  | 1.431394  | 3.386726  | 1.026591  |
| C  | -0.006533 | 2.583666  | -2.433964 |
| H  | -0.008101 | 3.661199  | -2.634592 |
| H  | 0.877473  | 2.136085  | -2.899587 |
| H  | -0.891575 | 2.134216  | -2.895786 |
| C  | 3.388951  | 0.722505  | 1.469341  |
| H  | 4.465000  | 0.526523  | 1.398998  |
| H  | 3.214732  | 1.796075  | 1.369679  |
| H  | 3.028334  | 0.412631  | 2.455329  |
| C  | 3.189803  | -1.912274 | 0.414571  |
| H  | 4.283544  | -1.874064 | 0.349133  |
| H  | 2.894431  | -2.295908 | 1.395447  |
| H  | 2.794936  | -2.588772 | -0.347249 |
| C  | 3.336253  | 0.262938  | -1.396534 |
| H  | 4.418218  | 0.115509  | -1.300897 |
| H  | 2.955708  | -0.362548 | -2.209985 |
| H  | 3.144147  | 1.309384  | -1.649359 |

35

E = -638.451975 a.u.

|    |           |           |           |
|----|-----------|-----------|-----------|
| Re | 0.262689  | 0.030070  | 0.072287  |
| C  | -1.770077 | 1.174235  | 0.342064  |
| C  | -1.986205 | 0.238857  | -0.740929 |
| C  | -1.847697 | -1.078717 | -0.204904 |
| C  | -1.570079 | -0.982337 | 1.199398  |
| C  | -1.521823 | 0.418350  | 1.533885  |
| H  | -1.870981 | 2.247080  | 0.283574  |
| H  | -2.256199 | 0.487369  | -1.755494 |
| H  | -1.971338 | -1.997177 | -0.759560 |
| H  | -1.462333 | -1.805681 | 1.887591  |
| H  | -1.359833 | 0.825755  | 2.519990  |
| C  | 1.612755  | 0.125738  | 1.358318  |
| O  | 2.445652  | 0.186658  | 2.228121  |
| P  | 1.448970  | -1.706830 | -0.978866 |
| P  | 1.278327  | 1.798184  | -1.074826 |
| C  | 1.260169  | -1.968400 | -2.820322 |
| H  | 1.761980  | -2.885979 | -3.150844 |
| H  | 0.195886  | -2.031930 | -3.070485 |
| H  | 1.685685  | -1.116697 | -3.361267 |
| C  | 3.299794  | -1.826634 | -0.801641 |
| H  | 3.674089  | -2.762432 | -1.232207 |
| H  | 3.785596  | -0.985226 | -1.302430 |
| H  | 3.558285  | -1.786479 | 0.261016  |
| C  | 0.984265  | -3.412445 | -0.370782 |
| H  | 1.563855  | -4.191718 | -0.880104 |
| H  | 1.172534  | -3.468427 | 0.706138  |
| H  | -0.081350 | -3.594131 | -0.542159 |
| C  | 1.420520  | 3.372395  | -0.081210 |
| H  | 2.062346  | 3.184524  | 0.785863  |
| H  | 1.838717  | 4.196968  | -0.671359 |
| H  | 0.430136  | 3.657542  | 0.287877  |
| C  | 3.022306  | 1.713191  | -1.734063 |
| H  | 3.703814  | 1.449004  | -0.919028 |
| H  | 3.093162  | 0.947564  | -2.513304 |
| H  | 3.329353  | 2.676637  | -2.157492 |
| C  | 0.390667  | 2.434548  | -2.589293 |
| H  | -0.641047 | 2.690897  | -2.328077 |
| H  | 0.885204  | 3.323393  | -2.999065 |
| H  | 0.365337  | 1.651623  | -3.354004 |

36

E = -777.563176 a.u.

|    |           |           |           |
|----|-----------|-----------|-----------|
| Re | -0.002050 | 0.213357  | -0.001195 |
| C  | -0.172807 | 1.739381  | 1.373704  |
| C  | 0.163752  | 1.736207  | -1.380301 |
| C  | -0.164779 | 3.138710  | 1.225521  |
| H  | -0.355299 | 1.478342  | 2.430171  |
| C  | 0.173820  | 3.135584  | -1.232350 |
| H  | 0.322972  | 1.473152  | -2.439851 |
| C  | 0.008933  | 3.794176  | -0.003550 |
| H  | -0.292991 | 3.771982  | 2.107137  |
| H  | 0.301151  | 3.767012  | -2.115436 |
| H  | 0.012619  | 4.885420  | -0.004471 |
| P  | 2.456704  | 0.430434  | 0.040700  |
| P  | -2.462513 | 0.426202  | -0.044517 |
| P  | -0.023576 | -1.461402 | 1.823058  |
| P  | 0.028904  | -1.470308 | -1.816129 |
| C  | -3.073931 | 1.737120  | -1.215920 |
| H  | -4.161660 | 1.855731  | -1.143598 |
| H  | -2.578916 | 2.682218  | -0.981647 |
| H  | -2.804476 | 1.461051  | -2.240130 |
| C  | -3.293808 | 1.030345  | 1.517933  |
| H  | -2.832735 | 1.976263  | 1.811926  |
| H  | -4.366644 | 1.182037  | 1.352058  |
| H  | -3.159880 | 0.313525  | 2.332770  |
| C  | -3.676971 | -0.927063 | -0.503505 |
| H  | -4.703789 | -0.570902 | -0.359854 |
| H  | -3.551998 | -1.198638 | -1.556171 |
| H  | -3.522456 | -1.817466 | 0.111217  |
| C  | -1.607910 | -2.357886 | 2.292703  |
| H  | -1.425704 | -3.065509 | 3.110596  |
| H  | -2.374988 | -1.647296 | 2.612796  |
| H  | -1.984594 | -2.911044 | 1.426634  |
| C  | 0.474167  | -0.901543 | 3.547635  |



Electronic Supplementary Information for Dalton Transactions  
 This journal is © The Royal Society of Chemistry 2011

|   |           |           |           |
|---|-----------|-----------|-----------|
| H | 0.425610  | -1.726702 | 4.267722  |
| H | 1.495667  | -0.506690 | 3.526560  |
| H | -0.187666 | -0.097839 | 3.885873  |
| C | 1.043320  | -3.006068 | 1.732871  |
| H | 2.092092  | -2.742293 | 1.590167  |
| H | 0.948796  | -3.605162 | 2.646947  |
| H | 0.726462  | -3.615530 | 0.879883  |
| C | 3.666847  | -0.919655 | 0.519612  |
| H | 3.537644  | -1.177274 | 1.575459  |
| H | 3.511626  | -1.817508 | -0.083944 |
| H | 4.695121  | -0.568370 | 0.374271  |
| C | 3.288144  | 1.012986  | -1.529903 |
| H | 4.361898  | 1.162722  | -1.367965 |
| H | 3.149873  | 0.288806  | -2.337640 |
| H | 2.829835  | 1.957613  | -1.832589 |
| C | 3.070307  | 1.755432  | 1.194725  |
| H | 4.158046  | 1.871681  | 1.118885  |
| H | 2.576098  | 2.697992  | 0.949183  |
| H | 2.802353  | 1.492619  | 2.222744  |
| C | -1.052546 | -3.005272 | -1.732935 |
| H | -2.099593 | -2.732190 | -1.596164 |
| H | -0.957787 | -3.605052 | -2.646571 |
| H | -0.746656 | -3.617969 | -0.878174 |
| C | 1.611936  | -2.386138 | -2.252959 |
| H | 1.440447  | -3.086075 | -3.079764 |
| H | 2.396736  | -1.684618 | -2.548734 |
| H | 1.959281  | -2.950465 | -1.381726 |
| C | -0.437075 | -0.919271 | -3.552289 |
| H | -0.376285 | -1.749112 | -4.265950 |
| H | -1.458759 | -0.524309 | -3.551749 |
| H | 0.231114  | -0.118076 | -3.883876 |

### 37

E = -651.363221 a.u.

|    |           |           |           |
|----|-----------|-----------|-----------|
| Re | -0.041335 | -0.004469 | -0.512215 |
| C  | -1.420803 | -0.380239 | -2.370912 |
| C  | -0.915969 | 0.964427  | -2.477715 |
| C  | 0.516408  | 0.866991  | -2.610970 |
| C  | 0.888187  | -0.515976 | -2.608197 |
| C  | -0.323450 | -1.293994 | -2.458195 |
| H  | -2.461683 | -0.659777 | -2.305360 |
| H  | -1.503929 | 1.867063  | -2.527513 |
| H  | 1.190203  | 1.696037  | -2.763754 |
| H  | 1.881312  | -0.906722 | -2.767837 |
| H  | -0.397280 | -2.369488 | -2.473389 |
| P  | 0.978827  | 1.779816  | 0.596869  |
| P  | -1.908837 | -0.076868 | 0.889431  |
| P  | 1.160691  | -1.623715 | 0.661866  |
| C  | 0.076036  | 3.425815  | 0.581372  |
| H  | 0.684329  | 4.234723  | 1.005480  |
| H  | -0.187030 | 3.677228  | -0.451665 |
| H  | -0.852639 | 3.338687  | 1.155751  |
| C  | 2.615172  | 2.369483  | -0.114090 |
| H  | 2.472347  | 2.684825  | -1.152309 |
| H  | 3.023686  | 3.211849  | 0.457522  |
| H  | 3.334466  | 1.544555  | -0.104691 |
| C  | 1.494173  | 1.771255  | 2.403809  |
| H  | 1.933011  | 2.734717  | 2.690236  |
| H  | 0.631963  | 1.570080  | 3.045051  |
| H  | 2.237741  | 0.985163  | 2.571335  |
| C  | 3.037498  | -1.523931 | 0.673765  |
| H  | 3.394855  | -1.445472 | -0.358554 |
| H  | 3.361960  | -0.629338 | 1.215804  |
| C  | 3.490142  | -2.405631 | 1.144854  |
| C  | 0.912985  | -2.011479 | 2.483516  |
| H  | -0.115008 | -2.350520 | 2.647822  |
| H  | 1.600463  | -2.796470 | 2.821302  |
| H  | 1.077453  | -1.111403 | 3.083438  |
| C  | 1.003325  | -3.374723 | 0.005644  |
| H  | 1.601366  | -4.082575 | 0.592375  |
| H  | -0.048019 | -3.678838 | 0.034393  |
| H  | 1.340733  | -3.404665 | -1.035607 |
| C  | -3.357781 | 0.982819  | 0.342053  |
| H  | -3.638938 | 0.726507  | -0.684111 |
| H  | -4.228440 | 0.844137  | 0.994757  |
| H  | -3.059781 | 2.035962  | 0.358882  |
| C  | -2.810125 | -1.721295 | 1.015288  |

|   |           |           |          |
|---|-----------|-----------|----------|
| H | -3.068365 | -2.064718 | 0.007574 |
| H | -2.149348 | -2.469660 | 1.465466 |
| H | -3.727406 | -1.647058 | 1.613255 |
| C | -1.934879 | 0.387575  | 2.708810 |
| H | -1.223714 | -0.226272 | 3.268731 |
| H | -1.646477 | 1.438446  | 2.816802 |
| H | -2.935821 | 0.252201  | 3.135885 |

### 38

E = -726.735793 a.u.

|    |           |           |           |
|----|-----------|-----------|-----------|
| C  | -1.311153 | -0.000405 | 1.448610  |
| C  | -1.311103 | -0.000107 | -1.448815 |
| C  | -2.684665 | 0.000040  | 1.261706  |
| H  | -1.024880 | 0.000362  | 2.507115  |
| C  | -2.684611 | -0.000030 | -1.261933 |
| H  | -1.024810 | -0.000180 | -2.507312 |
| C  | -3.311732 | 0.000143  | -0.000121 |
| H  | -3.347178 | 0.000339  | 2.127724  |
| H  | -3.347140 | -0.000061 | -2.127944 |
| H  | -4.401996 | 0.000248  | -0.000159 |
| C  | 1.599179  | 0.000405  | -1.469195 |
| O  | 2.357231  | 0.000691  | -2.364726 |
| C  | 0.191033  | 1.991335  | 0.001310  |
| O  | 0.117759  | 3.157419  | 0.002049  |
| C  | 0.191169  | -1.991571 | -0.000371 |
| O  | 0.117373  | -3.157623 | -0.000174 |
| C  | 1.599658  | -0.000368 | 1.468604  |
| O  | 2.358241  | -0.000520 | 2.363693  |
| Tc | 0.261107  | -0.000110 | -0.000076 |

### 39

E = -750.523634 a.u.

|    |           |           |           |
|----|-----------|-----------|-----------|
| C  | -1.206809 | 0.000122  | 1.406611  |
| C  | -1.207563 | -0.000068 | -1.406409 |
| C  | -2.584776 | 0.000028  | 1.254103  |
| H  | -0.890650 | 0.000608  | 2.456337  |
| C  | -2.585443 | -0.000079 | -1.253153 |
| H  | -0.891977 | -0.000489 | -2.456307 |
| C  | -3.225105 | -0.000059 | 0.000650  |
| H  | -3.228501 | 0.000093  | 2.133468  |
| H  | -3.229674 | -0.000151 | -2.132149 |
| H  | -4.314855 | -0.000093 | 0.000925  |
| C  | 1.493051  | 0.000793  | -1.334291 |
| O  | 2.277994  | 0.001393  | -2.203728 |
| C  | 0.066232  | 1.823226  | 0.000525  |
| O  | -0.103957 | 2.980598  | 0.000549  |
| C  | 0.065915  | -1.823171 | -0.000791 |
| O  | -0.104736 | -2.980476 | -0.000689 |
| C  | 1.493951  | -0.000822 | 1.332883  |
| O  | 2.279534  | -0.001462 | 2.201742  |
| Mn | 0.240851  | 0.000014  | -0.000292 |

### 40

E = -714.562766 a.u.

|   |           |           |           |
|---|-----------|-----------|-----------|
| C | -1.394677 | 0.659323  | 0.327336  |
| C | -0.345159 | -1.788219 | -0.648252 |
| C | -2.616982 | 0.017227  | 0.113849  |
| H | -1.538472 | 1.710783  | 0.617003  |
| C | -1.695078 | -2.145158 | -0.695492 |
| H | 0.304828  | -2.642573 | -0.888573 |
| C | -2.759730 | -1.298534 | -0.351740 |
| H | -1.968788 | -3.155455 | -1.017921 |
| H | -3.772986 | -1.692070 | -0.454477 |
| C | 2.222052  | -0.510459 | -1.123712 |
| O | 3.113307  | -0.815236 | -1.853847 |
| C | 0.595945  | 1.617088  | -1.262414 |
| O | 0.646289  | 2.566340  | -1.971624 |
| C | 1.451148  | -1.278929 | 1.331408  |
| O | 1.995957  | -1.998504 | 2.100807  |
| C | 1.227261  | 1.394243  | 1.339446  |
| O | 1.535757  | 2.165251  | 2.194222  |
| W | 0.629569  | 0.016790  | -0.005671 |
| H | -3.546913 | 0.560455  | 0.313104  |

Electronic Supplementary Information for Dalton Transactions  
 This journal is © The Royal Society of Chemistry 2011

#### 41

E = -714.244674 a.u.

|    |           |           |           |
|----|-----------|-----------|-----------|
| C  | -1.359903 | 0.337373  | 1.388240  |
| C  | -1.359487 | -0.338243 | -1.388450 |
| C  | -2.744034 | 0.316804  | 1.208453  |
| H  | -1.089373 | 0.703414  | 2.391217  |
| C  | -2.743597 | -0.320991 | -1.208246 |
| H  | -1.088397 | -0.704024 | -2.391366 |
| C  | -3.385334 | -0.002904 | 0.000211  |
| H  | -3.403295 | 0.569821  | 2.046178  |
| H  | -3.402500 | -0.575399 | -2.045831 |
| H  | -4.477923 | -0.004116 | 0.000330  |
| C  | 1.520767  | 0.201435  | -1.575183 |
| O  | 2.198138  | 0.377018  | -2.538626 |
| C  | 0.519896  | 2.013285  | 0.245733  |
| O  | 0.732422  | 3.166704  | 0.405772  |
| C  | 0.521410  | -2.011624 | -0.245840 |
| O  | 0.734557  | -3.164921 | -0.405870 |
| C  | 1.521031  | -0.198759 | 1.574955  |
| O  | 2.198661  | -0.373843 | 2.538309  |
| Mo | 0.269770  | 0.000739  | -0.000073 |

#### 42

E = -613.530041 a.u.

|    |           |           |           |
|----|-----------|-----------|-----------|
| C  | -1.975825 | -0.722474 | -0.975746 |
| C  | -1.967804 | -1.159054 | 0.396955  |
| C  | -1.972116 | 0.010959  | 1.223073  |
| C  | -1.968758 | 1.164698  | 0.376221  |
| C  | -1.975790 | 0.703716  | -0.989222 |
| H  | -2.002762 | -1.364740 | -1.843092 |
| H  | -2.007526 | -2.181402 | 0.739691  |
| H  | -1.986800 | 0.020812  | 2.302845  |
| H  | -2.007695 | 2.193205  | 0.700282  |
| H  | -2.004652 | 1.330011  | -1.868025 |
| C  | 1.157840  | -1.354169 | -0.809810 |
| O  | 1.770412  | -2.218436 | -1.325827 |
| C  | 1.172701  | -0.024262 | 1.566808  |
| O  | 1.795849  | -0.039656 | 2.566707  |
| C  | 1.156741  | 1.379177  | -0.767905 |
| O  | 1.768747  | 2.259307  | -1.257090 |
| Tc | 0.078492  | -0.000016 | -0.000386 |

#### 43

E = -637.328687 a.u.

|    |           |           |           |
|----|-----------|-----------|-----------|
| C  | -1.856340 | -0.721396 | -0.975359 |
| C  | -1.843214 | -1.157405 | 0.395369  |
| C  | -1.850741 | 0.011004  | 1.220453  |
| C  | -1.844563 | 1.163182  | 0.374702  |
| C  | -1.855899 | 0.702812  | -0.988796 |
| H  | -1.867276 | -1.363268 | -1.842969 |
| H  | -1.863197 | -2.179948 | 0.738159  |
| H  | -1.850298 | 0.020867  | 2.299938  |
| H  | -1.863979 | 2.191850  | 0.698870  |
| H  | -1.868281 | 1.328790  | -1.867842 |
| C  | 0.961365  | -1.294034 | -0.772027 |
| O  | 1.558620  | -2.164664 | -1.288438 |
| C  | 0.975968  | -0.023247 | 1.496374  |
| O  | 1.584497  | -0.039013 | 2.501694  |
| C  | 0.960040  | 1.317857  | -0.732062 |
| O  | 1.556477  | 2.204300  | -1.221849 |
| Mn | -0.002124 | -0.000009 | -0.000739 |

#### 44

E = -601.332335 a.u.

|   |           |           |           |
|---|-----------|-----------|-----------|
| C | 0.654451  | -2.000763 | 1.052321  |
| C | 0.485306  | -2.315485 | -0.331001 |
| C | 1.321351  | -1.428698 | -1.094264 |
| C | 1.994019  | -0.564703 | -0.173641 |
| C | 1.598612  | -0.923777 | 1.156437  |
| H | 0.171390  | -2.500690 | 1.878683  |
| H | -0.145662 | -3.094272 | -0.732456 |
| H | 1.428364  | -1.424510 | -2.168394 |
| H | 1.953736  | -0.472709 | 2.070540  |
| C | -1.670764 | 0.321956  | 1.407290  |

|   |           |           |           |
|---|-----------|-----------|-----------|
| O | -2.431575 | 0.497990  | 2.326138  |
| C | -1.828392 | -0.089114 | -1.288737 |
| O | -2.692678 | -0.181324 | -2.124812 |
| C | -0.196938 | 1.857649  | -0.293174 |
| O | 0.007338  | 3.031338  | -0.479164 |
| W | -0.388643 | -0.045526 | 0.004137  |
| H | 2.701028  | 0.208510  | -0.434525 |

#### 45

E = -601.040057 a.u.

|    |           |           |           |
|----|-----------|-----------|-----------|
| C  | -2.051377 | -0.722154 | -0.972195 |
| C  | -2.051066 | -1.156162 | 0.395245  |
| C  | -2.042384 | 0.010842  | 1.220740  |
| C  | -2.051141 | 1.161859  | 0.374308  |
| C  | -2.052275 | 0.703353  | -0.985649 |
| H  | -2.062279 | -1.365256 | -1.840349 |
| H  | -2.067668 | -2.180140 | 0.738434  |
| H  | -2.042723 | 0.020697  | 2.301378  |
| H  | -2.067156 | 2.191995  | 0.698696  |
| H  | -2.064556 | 1.330466  | -1.865358 |
| C  | 1.248487  | -1.350440 | -0.809467 |
| O  | 1.894765  | -2.220695 | -1.329490 |
| C  | 1.261608  | -0.024244 | 1.564824  |
| O  | 1.916901  | -0.039644 | 2.572552  |
| C  | 1.247234  | 1.375439  | -0.767390 |
| O  | 1.892714  | 2.261881  | -1.260402 |
| Mo | 0.121972  | -0.000122 | -0.000398 |

#### 46

E = -829.046603 a.u.

|   |           |           |           |
|---|-----------|-----------|-----------|
| C | 1.382101  | 0.711938  | 0.279471  |
| C | 0.416537  | -1.793412 | -0.616373 |
| C | 2.618636  | 0.081818  | 0.145545  |
| H | 1.512965  | 1.709582  | 0.716572  |
| C | 1.777535  | -2.084571 | -0.692839 |
| H | -0.195775 | -2.611587 | -1.020937 |
| C | 2.822240  | -1.223299 | -0.316798 |
| H | 2.091163  | -3.065842 | -1.065081 |
| H | 3.834865  | -1.610839 | -0.392230 |
| C | -2.190238 | -1.153694 | 0.431291  |
| O | -3.074567 | -1.878043 | 0.764394  |
| C | -0.772829 | 0.543152  | 1.919325  |
| O | -0.937281 | 0.873376  | 3.046065  |
| C | -1.349448 | -0.216939 | -1.916789 |
| O | -1.842338 | -0.321111 | -2.989989 |
| C | -1.181498 | 1.914381  | -0.324022 |
| O | -1.481023 | 3.040251  | -0.568817 |
| O | 3.737027  | 0.894973  | 0.533437  |
| C | 5.069465  | 0.368286  | 0.401855  |
| H | 5.735095  | 1.166363  | 0.738842  |
| H | 5.227894  | -0.521692 | 1.028507  |
| H | 5.313484  | 0.110604  | -0.639207 |
| W | -0.604809 | 0.002625  | -0.034909 |

#### 47

E = -829.053298 a.u.

|   |           |           |           |
|---|-----------|-----------|-----------|
| C | 0.800348  | 0.015443  | -1.557324 |
| C | 1.059503  | -0.014483 | 1.273227  |
| C | 2.186130  | 0.019409  | -1.516674 |
| H | 0.441513  | 0.025575  | -2.597859 |
| C | 2.424174  | -0.007767 | 0.987664  |
| H | 0.897956  | -0.028243 | 2.362597  |
| C | 2.939036  | 0.008496  | -0.322822 |
| H | 3.142707  | -0.015699 | 1.807376  |
| C | -1.862573 | -0.018232 | 1.662171  |
| O | -2.511462 | -0.026410 | 2.665748  |
| C | -0.912071 | 2.020187  | 0.058982  |
| O | -1.096876 | 3.191468  | 0.096389  |
| C | -0.908400 | -2.028544 | 0.026474  |
| O | -1.091457 | -3.200574 | 0.045548  |
| C | -2.141724 | 0.006019  | -1.395893 |
| O | -2.955728 | 0.011961  | -2.269558 |
| H | 2.788899  | 0.031059  | -2.426875 |
| O | 4.317105  | 0.015486  | -0.563181 |
| C | 5.252703  | 0.005450  | 0.541906  |

Electronic Supplementary Information for Dalton Transactions  
 This journal is © The Royal Society of Chemistry 2011

|   |           |           |          |
|---|-----------|-----------|----------|
| H | 6.239990  | 0.013108  | 0.077416 |
| H | 5.136014  | 0.891299  | 1.177067 |
| H | 5.140341  | -0.894994 | 1.156976 |
| W | -0.704001 | -0.003760 | 0.016444 |

**48**

E = -829.058450 a.u.

|   |           |           |           |
|---|-----------|-----------|-----------|
| C | -1.700385 | -0.006425 | 0.004809  |
| C | 0.226762  | 2.142968  | 0.018008  |
| C | -2.613653 | 1.067372  | -0.004591 |
| C | -0.922919 | 2.928928  | 0.008019  |
| H | 1.136008  | 2.763627  | 0.034261  |
| C | -2.233051 | 2.410569  | -0.004418 |
| H | -0.844884 | 4.020716  | 0.013019  |
| H | -3.047175 | 3.139169  | -0.010815 |
| C | 2.473495  | 0.281242  | -0.007398 |
| O | 3.646565  | 0.510531  | -0.010444 |
| C | 0.612756  | -0.168900 | 2.023453  |
| O | 0.724748  | -0.302976 | 3.196765  |
| C | 0.590598  | -0.132286 | -2.029960 |
| O | 0.686904  | -0.248621 | -3.206492 |
| C | 0.506345  | -2.032547 | -0.019977 |
| O | 0.510675  | -3.223478 | -0.030844 |
| H | -3.685937 | 0.877643  | -0.009744 |
| O | -2.261475 | -1.292460 | 0.011856  |
| C | -3.704723 | -1.529603 | 0.015653  |
| H | -4.182136 | -1.126435 | -0.885536 |
| H | -3.805539 | -2.615357 | 0.031934  |
| H | -4.182398 | -1.099347 | 0.904065  |
| W | 0.491508  | -0.009770 | -0.001284 |

**49**

E = -943.549327 a.u.

|   |           |           |           |
|---|-----------|-----------|-----------|
| C | 1.704918  | -0.020256 | -0.003686 |
| C | -0.197877 | 2.134422  | -0.011871 |
| C | 2.619635  | 1.039187  | -0.019124 |
| C | 0.945479  | 2.925351  | -0.026103 |
| H | -1.102045 | 2.761994  | -0.011961 |
| C | 2.252219  | 2.390082  | -0.029229 |
| H | 0.852053  | 4.010937  | -0.035426 |
| C | -2.473844 | 0.281607  | 0.018658  |
| O | -3.647885 | 0.512828  | 0.023313  |
| C | -0.607982 | -0.152503 | -2.015698 |
| O | -0.716319 | -0.271163 | -3.191776 |
| C | -0.583997 | -0.113586 | 2.038791  |
| O | -0.678646 | -0.209586 | 3.218115  |
| C | -0.542126 | -0.032564 | 0.029526  |
| O | -0.561043 | -3.223818 | 0.041242  |
| H | 3.693448  | 0.874426  | -0.024265 |
| O | 2.261058  | -1.307292 | 0.004562  |
| C | 3.704732  | -1.541013 | -0.002685 |
| H | 4.186118  | -1.113856 | 0.885157  |
| H | 3.808553  | -2.626538 | 0.006361  |
| H | 4.174536  | -1.129862 | -0.904179 |
| W | -0.496180 | -0.012870 | 0.009805  |
| O | 3.376076  | 3.229917  | -0.043819 |
| C | 3.213935  | 4.668023  | -0.056001 |
| H | 2.687256  | 5.023173  | 0.837288  |
| H | 4.229945  | 5.066399  | -0.065882 |
| H | 2.676294  | 5.006814  | -0.949112 |

**50**

E = -943.554191 a.u.

|   |           |           |           |
|---|-----------|-----------|-----------|
| C | 1.740076  | -0.062841 | -0.005188 |
| C | -0.128117 | 2.196427  | -0.039392 |
| C | 2.683063  | 0.979327  | -0.022890 |
| C | 1.072726  | 2.926774  | -0.052464 |
| C | 2.341362  | 2.336220  | -0.044315 |
| H | 1.061749  | 4.015248  | -0.069897 |
| H | 3.183176  | 3.032067  | -0.056393 |
| C | -2.442270 | 0.312474  | -0.006505 |
| O | -3.622317 | 0.484002  | -0.007550 |
| C | -0.558450 | -0.089042 | -2.030492 |
| O | -0.661032 | -0.188706 | -3.209116 |
| C | -0.553621 | -0.025744 | 2.024464  |

|   |           |           |           |
|---|-----------|-----------|-----------|
| O | -0.653549 | -0.088732 | 3.205844  |
| C | -0.544516 | -1.981542 | 0.026944  |
| O | -0.597676 | -3.172684 | 0.045428  |
| H | 3.750261  | 0.764212  | -0.020487 |
| O | 2.256898  | -1.366338 | 0.015277  |
| C | 3.691768  | -1.645926 | 0.018312  |
| H | 4.182638  | -1.228912 | 0.906069  |
| H | 3.760853  | -2.734185 | 0.035679  |
| H | 4.180821  | -1.257557 | -0.883328 |
| W | -0.453073 | 0.025804  | -0.004436 |
| O | -1.311564 | 2.948623  | -0.050254 |
| C | -1.316851 | 4.410300  | -0.073958 |
| H | -0.830105 | 4.801405  | -0.975683 |
| H | -2.372955 | 4.682463  | -0.077428 |
| H | -0.828517 | 4.830441  | 0.813741  |

**51**

E = -848.482142 a.u.

|   |           |           |           |
|---|-----------|-----------|-----------|
| C | -1.298047 | 0.478273  | 0.082138  |
| C | 0.020903  | -1.954521 | -0.495698 |
| C | -2.484465 | -0.272063 | -0.053230 |
| H | -1.490477 | 1.495870  | 0.432029  |
| C | -1.296432 | -2.399628 | -0.609928 |
| H | 0.741178  | -2.734275 | -0.779857 |
| C | -2.456837 | -1.645472 | -0.393800 |
| H | -1.472890 | -3.444842 | -0.888873 |
| H | -3.398726 | -2.176236 | -0.499805 |
| C | 2.465275  | -0.878209 | 0.603335  |
| O | 3.414479  | -1.434116 | 1.061110  |
| C | 1.642160  | -0.362015 | -1.880122 |
| O | 2.195697  | -0.544646 | -2.913477 |
| C | 0.770000  | 0.787344  | 1.803489  |
| O | 0.824537  | 1.270398  | 2.886360  |
| C | 1.125319  | 1.916947  | -0.585676 |
| O | 1.287894  | 3.035273  | -0.964376 |
| W | 0.779823  | -0.002558 | -0.072248 |
| N | -3.758285 | 0.336654  | 0.154461  |
| C | -4.976056 | -0.456578 | 0.116241  |
| H | -4.952301 | -1.287810 | 0.839099  |
| H | -5.829565 | 0.178514  | 0.368394  |
| H | -5.168794 | -0.896364 | -0.877403 |
| C | -3.855649 | 1.767330  | 0.409578  |
| H | -3.412557 | 2.060577  | 1.374862  |
| H | -3.350217 | 2.354959  | -0.370499 |
| H | -4.910312 | 2.057778  | 0.421058  |

**52**

E = -848.495319 a.u.

|   |           |           |           |
|---|-----------|-----------|-----------|
| C | 0.706182  | -1.406035 | -0.061064 |
| C | 0.707150  | 1.406007  | 0.064640  |
| C | 2.083105  | -1.253404 | -0.055335 |
| H | 0.443574  | -2.474821 | -0.108294 |
| C | 2.083886  | 1.252460  | 0.057601  |
| H | 0.445157  | 2.474922  | 0.112086  |
| C | 2.768732  | -0.000704 | 0.000587  |
| H | 2.705220  | -2.146236 | -0.095235 |
| H | 2.706702  | 2.144802  | 0.097633  |
| C | -2.261370 | 1.524063  | 0.069205  |
| O | -3.001165 | 2.463115  | 0.112751  |
| C | -1.115956 | 0.092884  | -2.024224 |
| O | -1.272336 | 0.147108  | -3.200419 |
| C | -1.122614 | -0.090166 | 2.024806  |
| O | -1.281485 | -0.141914 | 3.200806  |
| C | -2.263443 | -1.521109 | -0.072023 |
| O | -3.005513 | -2.458258 | -0.117835 |
| N | 4.161207  | -0.001113 | -0.000341 |
| C | 4.917480  | -1.254674 | -0.064004 |
| H | 4.689473  | -1.820697 | -0.976337 |
| H | 5.985334  | -1.026141 | -0.061683 |
| H | 4.703706  | -1.904087 | 0.794919  |
| C | 4.918472  | 1.251895  | 0.062415  |
| H | 4.702635  | 1.902163  | -0.795311 |
| H | 4.693525  | 1.817318  | 0.975907  |
| H | 5.986164  | 1.022661  | 0.056776  |
| W | -0.950590 | 0.000508  | 0.000575  |

Electronic Supplementary Information for Dalton Transactions  
 This journal is © The Royal Society of Chemistry 2011

### 53

E = -848.503762 a.u.

|   |           |           |           |
|---|-----------|-----------|-----------|
| C | 1.649215  | 0.280429  | -0.085873 |
| C | -0.608542 | 1.851820  | 1.090034  |
| C | 2.155049  | 1.635630  | -0.189251 |
| C | 0.289890  | 2.886984  | 0.976782  |
| C | 1.537752  | 2.773263  | 0.286870  |
| H | 3.144850  | 1.790212  | -0.620106 |
| H | 0.090531  | 3.864928  | 1.428650  |
| C | -2.544332 | -0.072797 | 0.336519  |
| O | -3.718377 | -0.023491 | 0.550205  |
| C | -0.728007 | 0.945167  | -1.702684 |
| O | -0.800398 | 1.533644  | -2.729789 |
| C | -0.295586 | -1.203526 | 1.703052  |
| O | -0.114913 | -1.897797 | 2.654451  |
| C | -0.776288 | -1.761531 | -1.050895 |
| O | -0.971106 | -2.754041 | -1.698841 |
| H | 2.107746  | 3.699290  | 0.174753  |
| N | 2.638349  | -0.671221 | -0.093729 |
| C | 2.363930  | -2.113442 | -0.065131 |
| H | 3.101764  | -2.639745 | -0.683207 |
| H | 2.412663  | -2.508752 | 0.958663  |
| H | 1.368404  | -2.297986 | -0.457362 |
| C | 4.081123  | -0.352443 | -0.017185 |
| H | 4.498096  | -0.082168 | -0.997571 |
| H | 4.253883  | 0.476860  | 0.673203  |
| H | 4.618234  | -1.229494 | 0.353042  |
| H | -1.497526 | 2.112048  | 1.682273  |
| W | -0.570049 | -0.090520 | 0.038159  |

### 54

E = -763.990581 a.u.

|   |           |           |           |
|---|-----------|-----------|-----------|
| C | 1.484192  | 0.183378  | 0.454585  |
| C | 0.013373  | -2.174764 | -0.101105 |
| C | 2.542598  | -0.715088 | 0.607709  |
| H | 1.769868  | 1.200253  | 0.753559  |
| C | 1.258375  | -2.781651 | 0.092049  |
| H | -0.739651 | -2.904526 | -0.433109 |
| C | 2.440571  | -2.108115 | 0.424918  |
| H | 1.347952  | -3.866258 | -0.026636 |
| H | 3.346310  | -2.697637 | 0.556499  |
| C | -2.488062 | -0.725037 | 0.149762  |
| O | -3.591986 | -1.125464 | 0.348210  |
| C | -0.898797 | 0.709135  | 1.765499  |
| O | -1.150600 | 1.221906  | 2.803060  |
| C | -0.941920 | -0.494761 | -2.036567 |
| O | -1.218244 | -0.682091 | -3.173517 |
| C | -0.622554 | 1.810008  | -0.681817 |
| O | -0.582474 | 2.924629  | -1.098576 |
| C | 4.700749  | 0.803396  | -0.399820 |
| H | 5.684815  | 1.247004  | -0.214092 |
| H | 4.763482  | 0.122353  | -1.253329 |
| H | 3.983838  | 1.598046  | -0.622322 |
| S | 4.198243  | -0.106599 | 1.125265  |
| W | -0.578390 | -0.113372 | -0.070590 |

### 55

E = -763.990644 a.u.

|   |           |           |           |
|---|-----------|-----------|-----------|
| C | 0.603448  | -1.246832 | -0.901809 |
| C | 0.842215  | 1.060923  | 0.697743  |
| C | 1.992968  | -1.222460 | -0.856205 |
| H | 0.248713  | -2.152144 | -1.417255 |
| C | 2.210668  | 0.861899  | 0.504032  |
| H | 0.665991  | 2.011389  | 1.224887  |
| C | 2.756856  | -0.224326 | -0.206717 |
| H | 2.563051  | -2.021759 | -1.340321 |
| H | 2.908259  | 1.592859  | 0.912539  |
| C | -2.004217 | 1.009801  | 1.364596  |
| O | -2.605212 | 1.586610  | 2.218445  |
| C | -1.209200 | 1.645608  | -1.159218 |
| O | -1.467951 | 2.598903  | -1.815703 |
| C | -1.240013 | -1.597306 | 1.217053  |
| O | -1.516709 | -2.518851 | 1.909573  |
| C | -2.281481 | -0.849178 | -1.190223 |
| O | -3.050867 | -1.343346 | -1.955519 |

|   |           |           |           |
|---|-----------|-----------|-----------|
| S | 4.531245  | -0.453804 | -0.393386 |
| C | 5.280935  | 0.787159  | 0.730592  |
| H | 6.359009  | 0.601478  | 0.711042  |
| H | 5.088830  | 1.808600  | 0.392445  |
| H | 4.912120  | 0.664361  | 1.751917  |
| W | -0.901744 | 0.006663  | 0.007508  |

### 56

E = -764.003383 a.u.

|   |           |           |           |
|---|-----------|-----------|-----------|
| C | 0.739879  | 2.115709  | 0.004283  |
| C | -1.579548 | 0.352608  | -0.000533 |
| C | -0.246903 | 3.098679  | 0.005811  |
| H | 1.747203  | 2.559511  | 0.005707  |
| C | -2.258558 | 1.584067  | 0.001762  |
| C | -1.630061 | 2.833058  | 0.004643  |
| H | 0.032432  | 4.157094  | 0.008093  |
| H | -3.348484 | 1.609965  | 0.001375  |
| C | 0.470829  | -2.072155 | -0.004508 |
| O | 0.465777  | -3.266033 | -0.007118 |
| C | 0.617159  | -0.172213 | -2.032586 |
| O | 0.633737  | -0.281239 | -3.212342 |
| C | 0.615228  | -0.180639 | 2.031708  |
| O | 0.630716  | -0.294491 | 3.211026  |
| C | 2.598744  | -0.051451 | 0.000798  |
| O | 3.791448  | 0.012738  | 0.001505  |
| H | -2.294188 | 3.700867  | 0.006134  |
| S | -2.525922 | -1.125404 | -0.003749 |
| C | -4.333163 | -0.681077 | -0.003427 |
| H | -4.603591 | -0.110318 | -0.896675 |
| H | -4.878924 | -1.629849 | -0.004912 |
| H | -4.603942 | -0.112915 | 0.891370  |
| W | 0.602507  | -0.051037 | -0.000186 |

### 57

E = -806.790036 a.u.

|   |           |           |           |
|---|-----------|-----------|-----------|
| C | 1.538461  | 0.596578  | 0.259793  |
| C | 0.397862  | -1.883761 | -0.473066 |
| C | 2.744245  | -0.125511 | 0.174855  |
| H | 1.713226  | 1.611914  | 0.639161  |
| C | 1.738369  | -2.290023 | -0.526483 |
| H | -0.270910 | -2.680198 | -0.830755 |
| C | 2.832681  | -1.484583 | -0.212521 |
| H | 1.973224  | -3.313720 | -0.831624 |
| H | 3.827294  | -1.925452 | -0.264370 |
| C | -2.230425 | -0.982085 | 0.298959  |
| O | -3.206031 | -1.616948 | 0.543687  |
| C | -0.680883 | 0.462906  | 1.949146  |
| O | -0.858913 | 0.756264  | 3.081426  |
| C | -1.098825 | -0.102010 | -1.972270 |
| O | -1.516127 | -0.138517 | -3.079206 |
| C | -0.959685 | 1.963587  | -0.263122 |
| O | -1.179208 | 3.114688  | -0.462838 |
| C | 3.985003  | 0.532946  | 0.498402  |
| N | 4.994806  | 1.079685  | 0.761185  |
| W | -0.499815 | 0.007107  | -0.029236 |

### 58

E = -806.790155 a.u.

|   |           |           |           |
|---|-----------|-----------|-----------|
| C | -1.056178 | -0.507055 | 1.316437  |
| C | -1.052750 | 0.499434  | -1.321418 |
| C | -2.437712 | -0.467692 | 1.152305  |
| H | -0.784002 | -0.954735 | 2.281257  |
| C | -2.434797 | 0.453207  | -1.163474 |
| H | -0.778516 | 0.948504  | -2.285012 |
| C | -3.104664 | -0.008900 | -0.007085 |
| H | -3.082397 | -0.807344 | 1.966499  |
| H | -3.077503 | 0.789721  | -1.980532 |
| C | 1.650617  | -0.403813 | -1.643159 |
| O | 2.247011  | -0.701733 | -2.626223 |
| C | 1.122733  | 1.893735  | -0.475087 |
| O | 1.508927  | 2.980411  | -0.741346 |
| C | 1.129102  | -1.890912 | 0.479721  |
| O | 1.519083  | -2.975818 | 0.747660  |
| C | 1.641841  | 0.409064  | 1.649982  |
| O | 2.233003  | 0.709683  | 2.635387  |

Electronic Supplementary Information for Dalton Transactions  
This journal is © The Royal Society of Chemistry 2011

|   |           |           |           |
|---|-----------|-----------|-----------|
| C | -4.536729 | -0.012450 | -0.010292 |
| N | -5.715171 | -0.015386 | -0.012927 |
| W | 0.548007  | 0.000112  | 0.001077  |

## 59

E = -806.793895 a.u.

|   |           |           |           |
|---|-----------|-----------|-----------|
| C | -1.827822 | 0.323698  | -0.054634 |
| C | -0.323406 | -2.111532 | -0.039517 |
| C | -2.907038 | -0.575882 | -0.087148 |
| C | -1.598019 | -2.688584 | -0.021903 |
| H | 0.460681  | -2.875575 | 0.061987  |
| C | -2.799883 | -1.971942 | -0.055826 |
| H | -3.919818 | -0.171550 | -0.150293 |
| H | -1.688394 | -3.778588 | 0.014732  |
| H | -3.729975 | -2.540990 | -0.062468 |
| C | 2.102806  | -0.739231 | -0.640999 |
| O | 3.119797  | -1.182080 | -1.072496 |
| C | 0.358703  | 0.930834  | -1.791336 |
| O | 0.463851  | 1.526368  | -2.806150 |
| C | 1.024289  | -0.642190 | 1.807694  |
| O | 1.503628  | -0.940736 | 2.848322  |
| C | 0.670564  | 1.781004  | 0.746115  |
| O | 0.875395  | 2.827306  | 1.264652  |
| C | -2.236293 | 1.693543  | -0.158279 |
| N | -2.535712 | 2.834459  | -0.234034 |
| W | 0.318461  | -0.069771 | -0.009728 |

## 60

E = -919.005587 a.u.

|   |           |           |           |
|---|-----------|-----------|-----------|
| C | 1.331266  | 0.555869  | 0.117484  |
| C | 0.096224  | -1.955289 | -0.307937 |
| C | 2.485997  | -0.217861 | 0.049429  |
| H | 1.571208  | 1.597534  | 0.348184  |
| C | 1.426855  | -2.411079 | -0.361100 |
| H | -0.603784 | -2.774426 | -0.531959 |
| C | 2.548667  | -1.608572 | -0.182475 |
| H | 1.624294  | -3.468940 | -0.552141 |
| H | 3.535171  | -2.057720 | -0.218717 |
| C | -2.548009 | -0.878400 | 0.157028  |
| O | -3.583058 | -1.448979 | 0.294419  |
| C | -0.884959 | 0.266536  | 1.991932  |
| O | -1.039544 | 0.456162  | 3.148118  |
| C | -1.164624 | 0.008614  | -2.018994 |
| O | -1.483094 | 0.039268  | -3.157197 |
| C | -1.204046 | 1.967786  | -0.122169 |
| O | -1.440999 | 3.128173  | -0.219015 |
| W | -0.734290 | -0.004164 | -0.026041 |
| N | 3.799509  | 0.440972  | 0.235858  |
| O | 4.862580  | -0.258338 | 0.137133  |
| O | 3.841480  | 1.685703  | 0.483827  |

## 61

E = -919.004822 a.u.

|   |           |           |           |
|---|-----------|-----------|-----------|
| C | 0.798988  | -1.400676 | 0.198325  |
| C | 0.799892  | 1.400606  | -0.198166 |
| C | 2.178425  | -1.236446 | 0.170255  |
| H | 0.526441  | -2.455885 | 0.319889  |
| C | 2.179217  | 1.235200  | -0.171800 |
| H | 0.528168  | 2.456095  | -0.319158 |
| C | 2.827012  | -0.000906 | -0.001224 |
| H | 2.833309  | 2.095510  | -0.292511 |
| C | -1.776940 | 1.149643  | -1.344925 |
| O | -2.319486 | 1.797743  | -2.175579 |
| C | -1.548348 | -1.447278 | -1.210276 |
| O | -2.000007 | -2.270665 | -1.929625 |
| C | -1.549427 | 1.448806  | 1.210885  |
| O | -2.002601 | 2.271849  | 1.929694  |
| C | -1.777456 | -1.148173 | 1.346178  |
| O | -2.319664 | -1.796109 | 2.177154  |
| H | 2.831889  | -2.097266 | 0.290685  |
| W | -0.793429 | 0.000659  | 0.000641  |
| N | 4.278046  | -0.001469 | -0.001802 |
| O | 4.903317  | -1.110192 | 0.116292  |
| O | 4.904124  | 1.106723  | -0.120317 |

## 62

E = -919.005594 a.u.

|   |           |           |           |
|---|-----------|-----------|-----------|
| C | 1.612860  | 0.497061  | -0.008043 |
| C | -0.720803 | 2.056465  | -0.381054 |
| C | 2.251147  | 1.725583  | -0.199477 |
| C | 0.205200  | 3.101173  | -0.479492 |
| H | -1.752474 | 2.434864  | -0.398222 |
| C | 1.593550  | 2.942055  | -0.413025 |
| H | -0.157722 | 4.122673  | -0.627320 |
| H | 2.217100  | 3.827571  | -0.532390 |
| C | -2.313418 | -0.257259 | -0.799443 |
| O | -3.375880 | -0.336599 | -1.327747 |
| C | 0.009549  | -1.265474 | -1.581885 |
| O | 0.184060  | -2.002643 | -2.483564 |
| C | -1.550149 | 0.438538  | 1.642262  |
| O | -2.221101 | 0.657765  | 2.592832  |
| C | -0.077327 | -1.712891 | 1.058212  |
| O | 0.147067  | -2.646426 | 1.751085  |
| H | 3.338954  | 1.743137  | -0.175816 |
| W | -0.478977 | -0.036199 | -0.014934 |
| N | 2.649871  | -0.563528 | 0.178398  |
| O | 2.503065  | -1.698265 | -0.371293 |
| O | 3.659975  | -0.304762 | 0.913867  |
